# 1           **Centriole triplet microtubules are required for stable centriole** 2           **formation and inheritance in human cells**

3  
4 Jennifer T. Wang<sup>a</sup>, Dong Kong<sup>b</sup>, Christian R. Hoerner<sup>c</sup>, Jadranka Loncarek<sup>b</sup>, Tim  
5 Stearns<sup>a,d,e</sup>

6 a. Department of Biology, Stanford University, Stanford CA

7 b. Laboratory of Protein Dynamics and Signaling, Center for Cancer Research –  
8 Frederick, National Cancer Institute, National Institutes of Health, Frederick MD

9 c. Department of Medicine – Division of Oncology, Stanford School of Medicine,  
10 Stanford CA

11 d. Department of Genetics, Stanford School of Medicine, Stanford CA

12 e. Corresponding author

## 14 **Summary**

15  
16 Centrioles are composed of long-lived microtubules arranged in nine triplets. In  
17 unicellular eukaryotes, loss of the noncanonical tubulins, delta-tubulin and epsilon-  
18 tubulin, result in loss of the triplet microtubule structure. However, the contribution of  
19 triplet microtubules to mammalian centriole formation and stability is unknown. Here, we  
20 report the first characterization of delta-tubulin and epsilon-tubulin *null* human cells.  
21 Centrioles in cells lacking either delta-tubulin or epsilon-tubulin lack triplet microtubules  
22 and fail to undergo centriole maturation. These aberrant centrioles are formed *de novo*  
23 each cell cycle, but are unstable and do not persist to the next cell cycle, leading to a  
24 futile cycle of centriole formation and disintegration. Disintegration can be suppressed  
25 by paclitaxel treatment. Delta-tubulin and epsilon-tubulin physically interact, indicating  
26 that these tubulins act together to maintain triplet microtubules and that these are  
27 necessary for inheritance of centrioles from one cell cycle to the next.

## 28 Introduction

29

30 The major microtubule organizing center of mammalian cells, the centrosome, is  
31 composed of a pair of centrioles with associated appendages and pericentriolar  
32 material. The centrioles have a nine-fold symmetry and are formed, in part, of long-lived  
33 microtubules, which persist through multiple cell divisions (Kochanski and Borisy, 1990;  
34 Balestra et al., 2015). In most organisms, including humans, the centriolar microtubules  
35 have a triplet structure, found only in centrioles. This structure consists of a complete A-  
36 tubule and associated partial B-tubule attached to the A-tubule wall, and a partial C-  
37 tubule attached to the B-tubule wall.

38

39 The molecular mechanisms involved in making triplet microtubules are not well-  
40 understood, even in the well-characterized somatic centriole cycle of mammalian cells.  
41 In these cells centrioles duplicate once per cycle, such that daughter cells receive  
42 exactly one pair of centrioles. Centriole duplication is initiated at the G1-S transition  
43 when the kinase PLK4 localizes to a single focus on the mother centriole (Sonnen et al.,  
44 2012). Subsequently, the cartwheel, formed by SASS6 oligomerization, assembles to  
45 template the 9-fold symmetry of the centriole (Guichard et al., 2017; Hilbert et al., 2016).  
46 Microtubules are added to the cartwheel underneath a cap of CP110 (Kleylein-Sohn et  
47 al., 2007). By G2-M, the triplet microtubules are completely formed (Vorobjev and  
48 Chentsov, 1982). Subsequently, the A- and B-tubules elongate to the full ~500 nm  
49 length of the centriole, forming a distal compartment with doublet microtubules and  
50 marked by POC5 (Azimzadeh et al., 2009). In mitosis, the cartwheel is lost, the newly-  
51 formed centriole becomes disengaged from its mother, and acquires pericentriolar  
52 material (Vorobjev and Chentsov, 1980; Vorobjev and Chentsov, 1982; Khodjakov and  
53 Rieder, 1999; Tsou and Stearns, 2006; Tsou et al., 2009). In G2-M of the following cell  
54 cycle, the centriole acquires appendages, marking its maturation into a centriole that  
55 can nucleate a cilium (Graser et al., 2007; Guarguaglini et al., 2005).

56

57 Members of the tubulin superfamily are critical for centriole formation and function. All  
58 eukaryotes have alpha-, beta- and gamma-tubulin, but the tubulin superfamily also  
59 includes three less-studied members, delta-tubulin, epsilon-tubulin, and zeta-tubulin.  
60 Recent work has shown that these noncanonical tubulins are evolutionarily co-  
61 conserved, making up the ZED tubulin module (Turk et al., 2015). In the unicellular  
62 eukaryotes *Chlamydomonas*, *Tetrahymena*, *Paramecium* and *Trypanosoma*, mutations  
63 in delta-tubulin or epsilon-tubulin result in centrioles that lack triplet microtubules  
64 (Dupuis-Williams et al., 2002; Dutcher and Trabuco, 1998; Dutcher et al., 2002;  
65 Gadelha et al., 2006; Garreau de Loubresse et al., 2001; Goodenough and StClair,  
66 1975; Ross et al., 2013). Humans and other placental mammals have delta-tubulin and  
67 epsilon-tubulin, but lack zeta-tubulin (Findeisen et al., 2014; Turk et al., 2015). Here, we

68 show that human cells lacking delta-tubulin or epsilon-tubulin also lack triplets, that this  
69 results in unstable centrioles and initiation of a futile cycle of centriole formation and  
70 disintegration, and identify an interaction between delta-tubulin and epsilon-tubulin.

71

## 72 **Results and Discussion**

73

74 To determine the roles of delta-tubulin and epsilon-tubulin in the mammalian centriole  
75 cycle, null mutations in *TUBD1* and *TUBE1* were made using CRISPR/Cas9 genome  
76 editing in hTERT RPE-1 human cells. Recent work has established that loss of  
77 centrioles in mammalian cells results in a p53-dependent cell-cycle arrest (Bazzi and  
78 Anderson, 2014; Lambrus et al., 2015; Wong et al., 2015). We found that homozygous  
79 null mutations of delta-tubulin or epsilon-tubulin could only be isolated in *TP53* *-/-* cells,  
80 thus all subsequent experiments use RPE1 *TP53* *-/-* cells as the control.

81

82 Three *TUBD1* *-/-* and two *TUBE1* *-/-* cell lines were generated (Figure 1A and Figure 3  
83 – supplemental figure 1). The *TUBD1* *-/-* lines are all compound heterozygotes bearing,  
84 proximal to the cut site, small deletions of less than 20 base pairs on one chromosome  
85 and insertion of one base pair on the other, resulting in frameshift and premature stop  
86 mutations. The two *TUBE1* *-/-* lines are compound heterozygotes bearing large  
87 deletions surrounding the cut site, that in each case remove an entire exon and  
88 surrounding DNA, including the ATG start site. In all cases, the next available ATG is  
89 not in-frame. We conclude that these alleles are likely to be null, or strong loss-of-  
90 function mutations.

91

92 We next assessed the phenotype of *TUBD1* *-/-* and *TUBE1* *-/-* cells stably expressing  
93 GFP-centrin as a marker of centrioles. Many cells in an asynchronous population had  
94 multiple, unpaired centrin foci (Fig. 1B). These foci also labeled with the centriolar  
95 proteins CP110 and SASS6 (see Figs 2 and 3). To determine whether these foci are  
96 centrioles, and to assess their ultrastructure, we analyzed them using correlative light-  
97 electron microscopy. In serial sections of interphase *TUBE1* *-/-* (Fig 1B) and *TUBD1* *-/-*  
98 (Fig 1C) cells, some of the centrin-positive foci corresponded to structures that  
99 resemble centrioles, but were narrower and shorter than typical centrioles and lack  
100 appendages. They contained a ~80 nm wide central lumen, with luminal content  
101 resembling cartwheel architecture that extends throughout the centriole's length (Fig 1 –  
102 supplement 1).

103

104 Centrioles in *TUBD1* *-/-* and *TUBE1* *-/-* cells were of similar diameter: 165 nm +/-15 nm  
105 in *TUBD1* *-/-* cells (n = 19 centrioles), 164 nm +/-13 nm in *TUBE1* *-/-* cells (n = 11  
106 centrioles), compared to 220 nm diameter of the proximal end of typical mammalian cell  
107 centrioles (Loncarek et al., 2008; Wang et al., 2015). The reduced diameter of these

108 aberrant centrioles is consistent with the presence of only singlet microtubules. Indeed,  
109 only singlet microtubules were identified in the two cross-sections observed, from  
110 *TUBD1* *-/-* cells (Figure 1C). These results demonstrate that cells lacking either delta-  
111 tubulin or epsilon-tubulin form defective centrioles that lack normal triplet microtubules.  
112 This is similar to the defects reported for delta-tubulin and epsilon-tubulin mutants in  
113 unicellular eukaryotes.

114  
115 Centrioles in both tubulin mutants were also shorter than typical, mature centrioles: 230  
116 nm +/-45 nm in *TUBD1* *-/-* cells (n = 14 centrioles), and 271 nm +/-43 nm in *TUBE1*  
117 *-/-* cells (n = 11 centrioles), compared to approximately 500 nm for typical human cell  
118 centrioles (Paintrand et al., 1992). Newly-formed mammalian centrioles, or  
119 procentrioles, reach their full length by elongation in G2-M, creating a distal  
120 compartment that is a feature of centrioles in some, but not all, organisms. We sought to  
121 determine whether the aberrant centrioles in *TUBD1* *-/-* and *TUBE1* *-/-* cells are  
122 capable of elongation and formation of the distal compartment. We analyzed the  
123 ultrastructure of centrioles in a *TUBE1* *-/-* prometaphase cell using correlative light-  
124 electron microscopy (Fig. 2A). These aberrant centrioles (n = 3) exhibited a striking  
125 morphological phenotype, consisting of two electron-dense segments, one of ~50 nm  
126 and the other of ~200 nm, connected by singlet microtubules spanning a gap of ~250  
127 nm. The total length (~500 nm) of these structures approximates that of typical mature  
128 mammalian centrioles.

129  
130 We hypothesized that the aberrant centrioles formed in *TUBD1* *-/-* and *TUBE1* *-/-* cells  
131 elongate in G2-M, but that only the A-tubule is present and thus able to elongate as a  
132 singlet. In this model, the shorter, distal density might correspond to the CP110 cap,  
133 under which the centriolar microtubules elongate (Kleylein-Sohn et al., 2007). The  
134 longer, 200 nm density corresponds to the proximal centriole end containing the  
135 cartwheel, as observed above in interphase cells. A prediction of this model is that the  
136 distance between CP110 and the SASS6 fluorescent labels would increase by about  
137 200 nm in mitosis. We found that in *TUBD1* *-/-* and *TUBE1* *-/-* interphase cells, similar to  
138 control *TP53* *-/-* cells, the centroids of CP110 and SASS6 foci were separated by a  
139 mean distance of 0.3  $\mu$ m, whereas in mitotic cells the foci were separated by a mean  
140 distance of 0.5  $\mu$ m (Fig 2B and 2C). Thus, centrioles in *TUBD1* *-/-* and *TUBE1* *-/-* cells  
141 elongate at the appropriate time in the cell cycle, and have a cap and proximal end  
142 typical of newly-formed centrioles. The lack of electron-dense structure between the  
143 cartwheel and cap might be due to a failure to recruit distal compartment components.  
144 Consistent with this, we found that the distal compartment component POC5 is absent  
145 from these aberrant centrioles (Fig 2D).

146

147 Together, these results indicate that the primary centriolar defect in cells lacking delta-  
148 tubulin or epsilon-tubulin is the absence of triplet microtubules. To determine the  
149 consequences of loss of triplet microtubules on the centriole cycle and centrosome  
150 formation, we first determined the distribution of centrioles in asynchronously dividing  
151 cell populations, as determined by staining for the established centriole proteins centrin  
152 and CP110. *TP53* *-/-* control cells had a typical centriole number distribution, with  
153 approximately 50% of cells having two centrioles, corresponding to cells in G1 phase,  
154 and 40% having three to four centrioles, corresponding to cells in S through M phases.  
155 In contrast, in *TUBD1* *-/-* and *TUBE1* *-/-* cells, approximately 50% of cells had 5 or more  
156 centriole foci, whereas 50% of cells had no detectable foci positive for both centrin and  
157 CP110 (Fig. 3A and 3B). Similar centriole distributions were found in other,  
158 independently derived, *TUBD1* *-/-* and *TUBE1* *-/-* cell lines. In addition, this phenotype  
159 could be rescued by expression of delta-tubulin and epsilon-tubulin, respectively (Fig 3  
160 – supplement 1A – 1C).

161  
162 We reasoned that a possible explanation for the centriole distribution in *TUBD1* *-/-* and  
163 *TUBE1* *-/-* cells is that the centriole structures we observed by EM are produced *de*  
164 *novo* in each cell cycle, and that these aberrant centrioles are unstable and do not  
165 persist into the next cell cycle. This hypothesis predicts that the aberrant centrioles in  
166 *TUBD1* *-/-* and *TUBE1* *-/-* cells would 1) not be paired, since *de novo* centrioles only  
167 form in the absence of an existing centriole, 2) lack markers of maturation such as distal  
168 appendages, since they would not persist to the point of acquiring such proteins, 3) fail  
169 to recruit substantial pericentriolar material, since the centriole-centrosome conversion  
170 occurs at entry to the next cell cycle, and 4) would be formed in S phase, and be lost at  
171 some point prior to the subsequent S phase.

172  
173 In agreement with this hypothesis, the centrioles, as visualized by centrin and CP110  
174 were never observed to be closely apposed, as is typical of wild-type cells (Fig. 3A).  
175 Rather, in interphase they appeared to be distributed within the central region of the cell  
176 (Fig. 3A). The centrioles in asynchronous *TUBD1* *-/-* and *TUBE1* *-/-* cells all lacked  
177 Cep164, a component of the centriolar distal appendage and marker of mature  
178 centrioles that have progressed through at least one cell cycle (Fig. 3C), whereas  
179 approximately 40% of all centrioles were positive for Cep164 in asynchronous control  
180 cells, consistent with the cycle of distal appendage acquisition (Nigg and Stearns,  
181 2011). Lastly, most of the centrioles in *TUBD1* *-/-* and *TUBE1* *-/-* cells lacked  
182 detectable gamma-tubulin (Fig. 3C), and those that stained positive had less than  
183 centrioles in control cells (Fig 3 – supplement 1D). In addition, we noted that SASS6,  
184 the cartwheel protein that is present in nascent and recently-formed centrioles, but is  
185 lost from centrioles at the mitosis-interphase transition in human cells, was present in  
186 most of the centrioles in *TUBD1* *-/-* and *TUBE1* *-/-* cells, consistent with these centrioles

187 originating in the observed cell cycle, but not having successfully persisted into the  
188 subsequent cell cycle.

189

190 To investigate the fate of newly-formed centrioles in *TUBD1* *-/-* and *TUBE1* *-/-* cells, we  
191 next tested the cell cycle-dependence of the formation and loss of aberrant centrioles in  
192 *TUBD1* *-/-* and *TUBE1* *-/-* cells (Fig 4A). As in previous experiments, about 50% of  
193 *TUBD1* *-/-* and *TUBE1* *-/-* cells in an asynchronous population had centrin and CP110-  
194 positive foci corresponding to aberrant centrioles. *TUBD1* *-/-* and *TUBE1* *-/-* cells were  
195 analyzed in different cell cycle stages as follows: G0/G1 – synchronized by serum  
196 withdrawal, S phase – identified from asynchronous culture by PCNA labeling, G2 –  
197 synchronized by the CDK1 inhibitor RO-3306, and M – identified from asynchronous  
198 culture by presence of condensed chromatin (Fig. 4A). *TUBD1* *-/-* and *TUBE1* *-/-* cells  
199 in G0/G1 mostly lacked centriole structures, whereas cells in S-phase, G2 and mitosis  
200 had them. These results indicate that in *TUBD1* *-/-* and *TUBE1* *-/-* cells, aberrant  
201 centrioles are formed in S-phase, persist into mitosis, and are absent in G1. We note  
202 that this loss of centriole structure is likely due to a specific event that occurs at the  
203 mitosis-interphase transition, rather than simply time since formation, since cells were  
204 arrested in G2 for 24 h, which is substantially longer than the normal progression  
205 through mitosis to G1, yet the centriole structures persisted (Fig 4A).

206

207 To more finely determine the timing of centriole loss in the mitosis-interphase transition,  
208 control or *TUBE1* *-/-* cells were synchronized by mitotic shakeoff, and the presence of  
209 centriole foci was assessed over time as cells entered G1 (Fig 4B). In control cells, the  
210 number of centrioles follows the pattern expected from the centriole duplication cycle. In  
211 *TUBE1* *-/-* cells, the majority of mitotic cells had centrioles. By 1 h after shakeoff, the  
212 fraction of interphase cells without centrioles had increased to 50%, and this fraction  
213 continued to increase at 2 h and 3 h after shakeoff. By 12 h after shakeoff, 56 +/-12% of  
214 cells had entered S-phase, and centriole structures began to appear, consistent with *de*  
215 *novovo* centriole formation. Thus, delta-tubulin and epsilon-tubulin are not required to  
216 initiate centriole formation in human cells, but the aberrant centrioles that form in their  
217 absence are unstable and disintegrate during progression from M phase to the  
218 subsequent G1 phase.

219

220 Centrioles formed *de novo* can persist to form fully mature centrioles (Lambrus et al.,  
221 2015; Wong et al., 2015), but have also been reported to be structurally defective  
222 (Wang et al., 2015). We tested whether the phenotype we observed is specific to loss of  
223 delta-tubulin and epsilon-tubulin, rather than a property of *de novo* centrioles in general,  
224 by assessing whether *de novo* centrioles formed in the presence of delta-tubulin and  
225 epsilon-tubulin would also disintegrate upon cell cycle progression. RPE-1 *TP53* *-/-* cells  
226 were treated with centrinone to inhibit PLK4 (Wong et al., 2015), a kinase required for

227 centriole duplication, for more than 2 weeks to obtain acentriolar cells. Centrinone was  
228 then washed out from mitotic cells; by 12 h after shakeoff, 36% of cells had entered S-  
229 phase, and centriole structures began to appear, consistent with *de novo* centriole  
230 formation. However, in contrast to *TUBD1* *-/-* and *TUBE1* *-/-* cells, these *de novo*  
231 centrioles persisted through the subsequent G1 (Fig 4C). We conclude that centriole  
232 instability in *TUBD1* *-/-* and *TUBE1* *-/-* cells is due to a specific defect in their structure,  
233 and is not a general feature of *de novo* centrioles, similar to previous reports (La Terra  
234 et al., 2005).

235  
236 We hypothesized that centriole disintegration may result from instability of the centriolar  
237 microtubules, perhaps as a result of elongation in G2-M phase. To test this,  
238 microtubules were stabilized in G2-M stage *TUBE1* *-/-* cells by addition of the  
239 microtubule-stabilizing drug paclitaxel. This treatment did not inhibit centriole elongation  
240 (Fig 4 – supplement 1B). Cells were allowed to enter mitosis in the presence of  
241 paclitaxel, and subsequently forced out of mitosis using the CDK inhibitor RO-3306.  
242 This treatment was sufficient to stabilize centrioles from mutant cells in G1, compared  
243 with cells that had not been treated with paclitaxel (Fig 4D and Fig 4 – supplement 1).  
244 These stabilized centrioles lose their SASS6 cartwheel and fail to recruit detectable  
245 gamma-tubulin (Fig 4 – supplement 1). We conclude that stabilization of the centriolar  
246 microtubules in *TUBE1* *-/-* cells stabilizes the centriole structure.

247  
248 One striking observation of this work is that the phenotypes of delta-tubulin and epsilon-  
249 tubulin null mutants are similar. This strongly suggests that the proteins work together to  
250 accomplish their function. To test this hypothesis, we assessed the ability of delta-  
251 tubulin and epsilon-tubulin to interact by co-expression in human HEK293T cells.  
252 Epsilon-tubulin could be immunoprecipitated with delta-tubulin from co-expressing cells,  
253 and not from control cells (Fig 5A).

254  
255 Together, our results show that delta-tubulin and epsilon-tubulin act together to create  
256 or stabilize structural features of centrioles. The most obvious such feature is the triplet  
257 microtubules, which define centrioles in most species, and are absent in delta-tubulin or  
258 epsilon-tubulin mutant cells in all organisms which have been examined. This suggests  
259 that delta-tubulin and epsilon-tubulin are required either to form the triplet microtubules,  
260 or to stabilize them against depolymerization. The former seems unlikely, since the  
261 presence of triplet centriolar microtubules is not strictly correlated with the presence of  
262 delta-tubulin and epsilon-tubulin in evolution (Fig 5B and Fig 5 - Supplemental Table 1).  
263 Among the organisms that completely lack the ZED tubulin module, *C. elegans* lacks  
264 triplet microtubules, but both *Drosophila* and the primitive plant *Ginkgo biloba* have  
265 triplet microtubules in their sperm cells. Since loss of the entire ZED tubulin module  
266 must have occurred independently in the dipteran insect and plant lineages, the most

267 parsimonious interpretation is that triplet microtubule formation itself does not require  
268 delta-tubulin or epsilon-tubulin, rather than that these two lineages independently  
269 evolved mechanisms of triplet formation in their absence. Thus, we propose that delta-  
270 tubulin and epsilon-tubulin are required for stabilization of the centriolar triplets in most  
271 organisms, such that the centrioles can mature and recruit other proteins. We do not yet  
272 know the molecular basis of this differential requirement for delta-tubulin or epsilon-  
273 tubulins with respect to microtubule triplet stability. However, we note that the few  
274 centriole-bearing organisms that lack delta-tubulin and epsilon-tubulin have simpler  
275 centriole structures that lack distal appendages, and, to the extent it is possible to tell,  
276 lack a distal compartment that is typical of more complex centrioles.

277  
278 Why do centrioles disintegrate in delta-tubulin and epsilon-tubulin mutant cells? We  
279 have shown that in *TUBD1* *-/-* and *TUBE1* *-/-* cells, aberrant centrioles with elongated  
280 singlet microtubules connecting the proximal and distal centriole segments become  
281 unstable as cells progress through mitosis. This is remarkably similar to the progressive  
282 loss of centrioles described in the original characterization of the epsilon-tubulin mutant  
283 *bald-2* by Goodenough and St. Clair (Goodenough and StClair, 1975). In human cells,  
284 Izquierdo, et al. reported that centrioles in *CEP295* *-/-* human cells also become  
285 unstable upon cell cycle progression, due to a failure of centrioles to recruit  
286 pericentriolar material that coincides with loss of the cartwheel during the centriole-to-  
287 centrosome conversion at the end of mitosis (Izquierdo et al., 2014). Although the  
288 phenotypes are outwardly similar to the phenotypes we describe here, CEP295 is  
289 conserved in species lacking delta-tubulin and epsilon-tubulin (Fu et al., 2015), and  
290 centrioles in *Chlamydomonas* do not undergo centriole-to-centrosome conversion. We  
291 propose that the post-duplication centriole elongation that creates the distal  
292 compartment of the centriole is a critical time in centriole stability, and that the triplet  
293 microtubules, either directly or through proteins that associate with them, are required to  
294 prevent centriole disassembly subsequent to that step. One possible basis for the  
295 instability is that events at the distal end of the centriole associated with preparing it to  
296 serve as a basal body for a cilium in G1 expose the ends of the centriolar microtubules.  
297 The doublet microtubules normally present at the end would be resistant to  
298 depolymerization in this model, but the singlets found in delta-tubulin and epsilon-tubulin  
299 mutants might be unstable. In accordance with this possibility, stabilization of centriolar  
300 microtubules with paclitaxel was able to prevent centriole disintegration, even when  
301 both the SASS6 cartwheel and pericentriolar material are lost (Fig 4D and Fig 4 –  
302 supplement 1). Another possibility is that centrioles lacking the normal triplet structure  
303 would likely also lack the A-C linker, which is visible in EM as a bridge between the A-  
304 and C-tubules of adjoining triplets. Perhaps the A-C linker is most important for stability  
305 after the full elongation of the centriolar microtubules. No components of the A-C linker



306 have been identified, but the *poc1* mutant in *Tetrahymena* causes partial loss of this  
307 linker and results in instability of triplet microtubules (Meehl et al., 2016).

308

309 Here we have shown that delta-tubulin and epsilon-tubulin likely work together in a  
310 critical function for centriole structure and function, and that cells lacking delta-tubulin or  
311 epsilon-tubulin undergo a futile cycle of *de novo* centriole formation and disintegration.  
312 Our results show that in human cells, delta-tubulin and epsilon-tubulin act to stabilize  
313 centriole structures necessary for inheritance of centrioles from one cell cycle to the  
314 next, perhaps by stabilizing the main structural feature of centrioles, the triplet  
315 microtubules.

316 **Figure legends**

317

318 **Figure 1: Centrioles in *TUBD1*  $-/-$  and *TUBE1*  $-/-$  cells are short and lack triplet**  
319 **microtubules**

320 **A)** Gene loci for *TUBD1* (ch17:59889203-59891260) and *TUBE1* (ch6: 11207685-  
321 11209742) in control and *TUBD1*  $-/-$  and *TUBE1*  $-/-$  cells (GRCh38.p7 Primary  
322 Assembly). Dark green boxes: exons, Arrows: translation start site, Red triangle: Cas9  
323 cut site. *TUBD1*  $-/-$  cells are compound heterozygotes, containing a 8 nt deletion (ch17:  
324 59891019-59891026) on one allele, resulting in a frameshift and premature stop after  
325 49 amino acids, and an insertion at nt 59891024 on the other, resulting in a frameshift  
326 and premature stop after 39 amino acids. The next ATG is not in-frame for either allele.  
327 *TUBE1*  $-/-$  cells are also compound heterozygotes, containing a 266 nt deletion  
328 (ch6:112087525-112087790) on one allele, removing exon 2 and resulting in a  
329 frameshift and premature stop after 8 amino acids, and a 545 nt deletion  
330 (ch6:112086987-112087531) on the other allele, removing the first exon and the ATG.  
331 The next ATG is not in-frame for either allele. **B)** Centrioles from *TUBE1*  $-/-$  cells. Left:  
332 DIC image and maximum intensity projection of *TUBE1*  $-/-$  GFP-centrin cells. Boxed  
333 GFP-centrin foci were then analyzed by correlative electron microscopy. Right: electron  
334 micrographs of centrioles from boxed foci. Centrioles are numbered and serial sections  
335 are adjacent to each other. Scale bar: 250 nm **C)** Centrioles from *TUBD1*  $-/-$  cells. Four  
336 centrioles are shown, and serial sections are adjacent to each other. For cross-sections  
337 from centrioles 1 and 2, a higher magnification image is placed third to show the  
338 presence of singlet microtubules (boxed). Arrows indicate singlet microtubules. Scale  
339 bar: 250 nm

340

341 **Figure 1 – figure supplement 1: Comparison to control centrioles**

342 Left: mature mother centriole from wildtype RPE-1 cells. Right: centriole from *TUBE1*  $-/-$   
343 cell. Scale bar: 250 nm

344

345 **Figure 2: Centrioles in *TUBD1*  $-/-$  and *TUBE1*  $-/-$  cells elongate but fail to recruit**  
346 **POC5**

347 **A)** Correlative light-electron micrographs of centrioles in a prometaphase *TUBE1*  $-/-$  cell.  
348 Centrioles are numbered. Left: DIC image. Boxed centriole in overview corresponds to  
349 centriole 1. For centrioles 2 and 3, two serial sections are shown, as marked on figure.  
350 For each centriole, the proximal density is located on the left, and the distal density is  
351 located on the right. Scale bars: overview, 10  $\mu$ m; inset: 250 nm. **B)** CP110 and SASS6  
352 separation distance in interphase and mitotic cells. Images are maximum projections of  
353 250 nm confocal stacks. Control cells are RPE-1 *TP53*  $-/-$ . Scale bars: overview, 5  $\mu$ m,  
354 inset: 500 nm. **C)** Quantification of CP110 and SASS6 separation distance. For each  
355 data point, 36 centrioles were measured. Control cells are RPE-1 *TP53*  $-/-$ . Error bars

356 represent the SEM. For each cell type, mitotic measurements are significantly different  
357 from interphase measurements (two-tailed unpaired t-test,  $p < 0.0001$ ). **D)** Quantification  
358 of the number of centrioles with POC5 localization in mitotic cells. Control cells are  
359 RPE-1 *TP53*<sup>-/-</sup>. Bars represent the mean of three independent experiments with 200  
360 centrioles each, error bars represent the SEM.

361

362 **Figure 3: Centriole distribution and composition in *TUBD1*<sup>-/-</sup> and *TUBE1*<sup>-/-</sup> cells**

363 **A)** Centriole phenotype for *TUBD1*<sup>-/-</sup> and *TUBE1*<sup>-/-</sup> cells. Two cells for each mutant  
364 are shown: one with no centrioles and the other with multiple centrioles. Control cells  
365 are RPE-1 *TP53*<sup>-/-</sup>. Scale bars: overview, 5  $\mu\text{m}$ ; insets: 1  $\mu\text{m}$ . **B)** Quantification of  
366 centriole number distribution in asynchronous cells, as measured by centrin and CP110  
367 colocalization. Control cells are RPE-1 *TP53*<sup>-/-</sup>. Bars represent the mean of three  
368 independent experiments with  $\geq 100$  cells each, error bars represent the SEM.

369 **C)** Quantification of the percent of centrin foci that colocalize with indicated centriole  
370 markers. SASS6 marks early centrioles but is absent from mature centrioles, TUBG1  
371 ( $\gamma$ -tubulin) marks maturing centrioles, CEP164 marks completely mature  
372 centrioles. Control cells are RPE-1 *TP53*<sup>-/-</sup>. Bars represent the mean of three  
373 independent experiments with  $\geq 200$  centrioles each, error bars represent the SEM.

374

375 **Figure 3 – figure supplement 1: Centriole distribution in independently-derived**  
376 **clonal cell lines and rescue of the phenotype**

377 **A)** Gene loci for *TUBD1* (ch17:59889203-59891260) and *TUBE1* (ch6: 11207685-  
378 11209742) in control and *TUBD1*<sup>-/-</sup> and *TUBE1*<sup>-/-</sup> cells (GRCh38.p7 Primary  
379 Assembly). Dark green boxes: exons, Arrows: translation start site, Red triangle: Cas9  
380 cut site. *TUBD1*<sup>-/-</sup> line 2 is a compound heterozygote, containing a 4 nt deletion (ch17:  
381 59891023-59891026) on one allele, resulting in a frameshift and premature stop after  
382 117 amino acids, and an insertion at nt 59891024 on the other, resulting in a frameshift  
383 and premature stop after 39 amino acids. *TUBD1*<sup>-/-</sup> line 3 is a compound heterozygote,  
384 containing a 17 nt deletion (ch17:59891015-59891031) on one allele, resulting in a  
385 frameshift and premature stop after 46 amino acids, and an insertion at nt 59891024 on  
386 the other, resulting in a frameshift and premature stop after 39 amino acids. *TUBE1*<sup>-/-</sup>  
387 line 2 is a compound heterozygote, containing a 1049 nt deletion (ch6:112086549-  
388 112087598) on one allele, removing exon 1 and the ATG, and a 329 nt deletion (ch6:  
389 112087153-112087482) and 4 nt insertion (CCGA) on the other allele, removing the first  
390 exon and the ATG. The next ATG is not in-frame for any mutants. **B)** Quantification of  
391 centriole number distribution in asynchronous cells for independently-derived *TUBD1*<sup>-/-</sup>  
392 and *TUBE1*<sup>-/-</sup> clonal cell lines, as measured by centrin and CP110 colocalization. Bars  
393 represent the mean of three independent experiments with  $\geq 100$  cells each, error bars  
394 represent the SEM. **C)** Quantification of centriole number distribution in asynchronous  
395 cells for rescue lines, as measured by centrin and CP110 colocalization. Cell line #1 for

396 each mutant were infected with untagged delta-tubulin or epsilon-tubulin, respectively.  
397 The rescue construct also contained monomeric Kusabira Orange kappa (mKOk) under  
398 a separate promoter. mKOk-positive cells were counted for each line. Bars represent  
399 the mean of three independent experiments with  $\geq 100$  cells each, error bars represent  
400 the SEM. **D)** Centrin and gamma-tubulin colocalization in the indicated cell lines. Control  
401 cells are RPE-1 *TP53*<sup>-/-</sup>. Scale bars: 5  $\mu$ m.

402

403 **Figure 4: *TUBD1*<sup>-/-</sup> and *TUBE1*<sup>-/-</sup> cells undergo a futile centriole**  
404 **formation/disintegration cycle**

405 **A)** Centriole presence in *TUBD1*<sup>-/-</sup> and *TUBE1*<sup>-/-</sup> cells is cell-cycle dependent.  
406 Quantification of the number of cells at each stage with centrin/CP110-positive  
407 centrioles. G0/G1 cells were obtained by serum withdrawal, S-phase by staining for  
408 PCNA, G2 by treatment with RO-3306, and mitosis by presence of condensed  
409 chromatin. Bars represent the mean of three independent experiments with  $\geq 100$  cells  
410 each, error bars represent the SEM. **B)** Quantification of the number of cells with  
411 centrin/CP110-positive centrioles at the indicated times after mitotic shakeoff. At 12  
412 hours, 56  $\pm$  12% of *TUBE1*<sup>-/-</sup> cells entered S-phase, as marked by PCNA staining.  
413 Control cells are RPE-1 *TP53*<sup>-/-</sup>. Bars represent the mean of three independent  
414 experiments with  $\geq 150$  cells each, error bars represent the SEM. **C)** *de novo* centrioles  
415 formed in the presence of *TUBE1* do not disintegrate in G1. Quantification of the  
416 number of cells with centrin/CP110-positive centrioles after centrinone treatment. RPE1  
417 *TP53*<sup>-/-</sup> cells were treated with centrinone for at least 2 weeks, then centrinone was  
418 washed out from mitotic cells. Cells were analyzed in S-phase, 12 hours after washout  
419 when 36% of cells had entered S-phase, and in the following G1 after mitotic shakeoff.  
420 Bars represent the mean of three independent experiments with  $\geq 100$  cells each, error  
421 bars represent the SEM. **D)** Paclitaxel rescues centriole disintegration phenotype.  
422 *TUBE1*<sup>-/-</sup> cells were either treated with paclitaxel or DMSO for 3 h in G2. Mitotic cells  
423 from both populations were harvested by mitotic shakeoff, and forced out of mitosis with  
424 RO-3306 for 3 h. Cells with micronuclei were analyzed for both conditions, and the  
425 percent of cells with indicated numbers of centrin/CP110-positive centrioles are shown.  
426 Bars represent the mean of three independent experiments with  $\geq 100$  cells each, error  
427 bars represent the SEM.

428

429 **Figure 4 – figure supplement 1: Aberrant centrioles are stabilized upon treatment**  
430 **with paclitaxel, despite losing SASS6 and pericentriolar material**

431 **A)** Stabilization of *TUBE1*<sup>-/-</sup> centrioles with paclitaxel treatment. Untreated *TUBE1*<sup>-/-</sup>  
432 interphase cells were obtained by allowing cells to grow for 3 h after mitotic shakeoff.  
433 DMSO with RO-3306 and paclitaxel with RO-3306 treatments were performed as shown  
434 for Fig 4D on *TUBE1*<sup>-/-</sup> cells. Bundled microtubules are present upon paclitaxel  
435 treatment, and micronuclei found in cells forced into G1 with RO-3306. In merged

436 image, both CP110 and alpha-tubulin are represented in red. Scale bars: 5  $\mu$ m. **B)**  
437 Quantification of CP110 and SASS6 separation distance in mitotic *TUBE1*  $-/-$  cells  
438 treated with paclitaxel. 36 centrioles were measured, and measurements are not  
439 significantly different from *TUBE1*  $-/-$  mitotic cells (compared to Fig 2C by two-tailed  
440 unpaired t-test,  $p=0.62$ ). Error bars represent the SEM. **C)** SASS6 is lost in stabilized  
441 centrioles in *TUBE1*  $-/-$  cells. Cells were treated with paclitaxel, then forced into G1 with  
442 RO-3306 as in Fig 4D. Left: Images of centrioles stained for centrin, CP110, and  
443 SASS6. Scale bar: 1  $\mu$ m. Right: Quantification of percent of cells that lack any centriolar  
444 SASS6. Bars represent the mean of three independent experiments with  $\geq 100$  cells  
445 each, error bars represent the SEM. **D)** Stabilized centrioles in *TUBE1*  $-/-$  cells lack  
446 gamma-tubulin. *TUBE1*  $-/-$  cells were either untreated and analyzed at mitosis, or  
447 treated with paclitaxel and RO-3306. Scale bars: 5  $\mu$ m.

448

#### 449 **Figure 5: TUBD1 and TUBE1 interaction and evolutionary analysis**

450 **A)** Co-immunoprecipitation of myc-TUBE1 and GFP-TUBD1. Complexes were  
451 immunoprecipitated (IP) with GFP-binding protein, and precipitated proteins were  
452 detected with anti-GFP and anti-Myc antibodies. **B)** Evolutionary analysis of the  
453 correlation of TUBD1 and TUBE1 presence with centriolar triplet microtubules, in  
454 organisms with centrioles. Black boxes represent genera in which the gene or feature is  
455 absent.

456

#### 457 **Figure 5 – figure supplement 1: Expanded evolutionary analysis**

## 458 **Materials and Methods**

459

### 460 **Cell culture**

461 hTERT RPE-1 *TP53*<sup>-/-</sup> cells were a gift from Meng-Fu Bryan Tsou (Memorial Sloan  
462 Kettering Cancer Center) and were cultured in DMEM/F-12 (Corning) supplemented  
463 with 10% Cosmic Calf Serum (CCS; HyClone). HEK293T cells were cultured in DMEM  
464 (Corning) supplemented with 10% CCS (HyClone). All cells were cultured at 37 °C  
465 under 5% CO<sub>2</sub>, and were routinely tested for mycoplasma contamination.

466

### 467 **Lentivirus production**

468 Recombinant lentiviruses were made by cotransfection of HEK293T cells with the  
469 respective transfer vectors, second-generation lentiviral cassettes (packaging vector  
470 psPAX2 and envelope vector pMD2.G) using 1 µg/µL polyethylenimine (PEI;  
471 Polysciences). The medium was changed 6-8 h after transfection, and viral supernatant  
472 was harvested after an additional 48 h.

473

### 474 **Generation of *TUBD1*<sup>-/-</sup> and *TUBE1*<sup>-/-</sup> cells and rescue lines**

475 hTERT RPE1 *TP53*<sup>-/-</sup> GFP-centrin cells were made by transduction with mEGFP-  
476 centrin2 lentivirus and 8 µg/mL Sequabrene carrier (Sigma-Aldrich). Cells were cloned  
477 by limiting dilution into 96-well plates.

478

479 *TUBD1*<sup>-/-</sup> cell lines were generated using lentiCRISPRv2 (Addgene plasmid #52961  
480 (Sanjana et al., 2014; Shalem et al., 2014) with the sgRNA sequence  
481 CTGCTCTATGAGAGAGAATG. hTERT RPE1 *TP53*<sup>-/-</sup> GFP-centrin cells were  
482 transduced with lentivirus and 8 µg/mL Sequabrene for 72 hours, then passaged into  
483 medium containing 6 µg/mL puromycin. Puromycin-containing culture medium was  
484 replaced daily for 5 days until all cells in uninfected control had died. Puromycin-  
485 resistant cells were cloned by limiting dilution into 96-well plates, followed by genotyping  
486 and phenotypic analysis.

487

488 *TUBE1*<sup>-/-</sup> cell line 1 was generated using pX330 (Addgene plasmid #42230 Cong et al.,  
489 2013) with the sgRNA sequence GGGTAGAGACCTGGTCCCG (pX330-TUBE1).  
490 hTERT RPE-1 *TP53*<sup>-/-</sup> cells were transiently co-transfected with pX330-TUBE1 and  
491 EGFP-expressing vector pEGFP-N1 (Clontech) at 9:1 ratio using Continuum  
492 Transfection Reagent (Gemini Bio-Products). GFP-positive cells were clonally sorted  
493 into single wells of 96-well plates by FACS, followed by genotyping and phenotypic  
494 analysis. Cells were subsequently transduced with GFP-centrin2 lentivirus for CLEM.

495

496 *TUBE1* *-/-* cell line 2 was generated using lentiCRISPRv2 with the sgRNA sequence  
497 GCGCACCCACCATGACCCAGT. Transduction and selection were carried out as for  
498 *TUBD1* *-/-* cell lines.

499  
500 Both rescue construct transfer vectors contained opposite orientation promoters: EF-  
501 1alpha promoter driving monomeric Kusabira Orange kappa (mKO) with rabbit beta-  
502 globin 3'UTR, as well as mouse PGK promoter driving the rescue construct with WPRE.  
503 For the delta-tubulin rescue construct, silent mutations were made in the PAM and  
504 surrounding sequence such that it was no longer complementary to the lentiCRISPR  
505 sgRNA (C117G and A120T) using QuikChange Lightning Site-Directed Mutagenesis Kit  
506 (Agilent). For the epsilon-tubulin rescue construct, full-length *TUBE1* cDNA was used.  
507 Using these transfer vectors, lentivirus was produced and *TUBD1* *-/-* and *TUBE1* *-/-*  
508 cells, respectively, were transduced. For rescue experiments, cells expressing mKO  
509 were counted.

510

### 511 **Correlative light and electron microscopy**

512 Correlative light and electron microscopy (CLEM) was performed as described  
513 previously (Kong and Loncarek, 2015), using hTERT RPE-1 *TP53* *-/-* *TUBD1* *-/-* and  
514 *TP53* *-/-* *TUBE1* *-/-* GFP-centrin cells. Cells in Rose chambers were enclosed in an  
515 environmental chamber at 37 °C and imaged on an inverted microscope (Eclipse Ti;  
516 Nikon, Tokyo, Japan) equipped with a spinning-disk confocal head (CSUX Spinning  
517 Disk; Yokogawa Electric Corporation, Tokyo, Japan). After analysis by live imaging,  
518 Rose chambers were perfused with freshly prepared 2.5% glutaraldehyde, and 200-nm  
519 thick Z-sections spanning the entire cell were recorded to register the position of  
520 centrioles. Cell positions on coverslips were then marked by diamond scribe. Rose  
521 chambers were disassembled, and cells were washed in PBS, followed by staining with  
522 2% osmium tetroxide and 1% uranyl acetate. Samples were dehydrated and embedded  
523 in Embed 812 resin. The same cells identified by light microscopy were then serially  
524 sectioned. The 80 nm-thick serial sections were transferred onto copper slot grids,  
525 stained with uranyl acetate and lead citrate, and imaged using a transmission electron  
526 microscope (H-7650; Hitachi, Tokyo, Japan).

527

### 528 **Immunofluorescence**

529 Cells were grown on poly-L-lysine-coated #1.5 glass coverslips. Cells were washed with  
530 PBS, then fixed with -20 °C methanol for 15 min. Coverslips were then washed with  
531 PBS and blocked with PBS-BT (3% BSA, 0.1% Triton X-100, 0.02% sodium azide in  
532 PBS) for 30 min. Coverslips were incubated with primary antibodies diluted in PBS-BT  
533 for 1 h, washed with PBS-BT, incubated with secondary antibodies and DAPI diluted in  
534 PBS-BT for 1 h, then washed again. Samples were mounted using Mowiol

535 (Polysciences) in glycerol containing 1,4,-diazobicycli-[2.2.2]octane (DABCO, Sigma-  
536 Aldrich) antifade.

537

### 538 **Antibodies**

539 Primary antibodies used for immunofluorescence: mouse IgG2b anti centrin3, clone 3e6  
540 (1:1000, Novus Biological), mouse IgG2a anti centrin, clone 20H5 (1:200, EMD  
541 Millipore), rabbit anti CP110 (1:200, Proteintech), mouse IgG2b anti SASS6 (1:200,  
542 Santa Cruz), mouse IgG1 anti gamma-tubulin, clone GTU-88 (1:1000, Sigma-Aldrich),  
543 rabbit anti POC5 (1:500, Bethyl Laboratories), rabbit anti CEP164 (1:500, described  
544 previously (Lee et al., 2014), mouse IgG2a anti PCNA (1:500, BioLegend). Primary  
545 antibodies used for Western blotting: goat anti GFP (1:500, Rockland), mouse IgG1 anti  
546 myc, clone 9e10 (1:100, Developmental Studies Hybridoma Bank). For  
547 immunofluorescence, AlexaFluor conjugated secondary antibodies (Thermo-Fisher)  
548 were diluted 1:1000. For Western blotting, IRDye conjugated donkey secondary  
549 antibodies (LiCOR) were diluted 1:20,000.

550

### 551 **Drug treatments and mitotic shakeoff**

552 For cell cycle analyses, *TUBD1* *-/-* or *TUBE1* *-/-* cells were seeded onto coverslips, then  
553 synchronized in G0/G1 by serum withdrawal for 24 h, or in G2 with 10  $\mu$ M RO-3306 for  
554 24 h. Cells were fixed for immunofluorescence and analyzed for centrin/CP110  
555 presence. Mitotic shakeoff was performed on asynchronously growing cells. One pre-  
556 shake was performed to improve synchronization. Cells were fixed at indicated times  
557 and analyzed for centrin/CP110 presence. For centrinone experiments, hTERT RPE-1  
558 *p53* *-/-* cells were treated with 125 nM centrinone for  $\geq$  2 weeks, and centrinone-  
559 containing medium was replaced on top of cells daily. For centrinone washout, cells  
560 were washed twice with PBS, then mitotic shakeoff was performed with centrinone-free  
561 medium. A subset of cells were fixed for immunofluorescence 12 h after shakeoff, when  
562 cells had entered S-phase. 19 h after shakeoff, a second shakeoff was performed to  
563 harvest cells that entered mitosis. Cells were fixed 3 h post-second shakeoff for  
564 immunofluorescence, and analyzed for centrin/CP110 presence. For paclitaxel  
565 experiments, mitotic cells were removed by shakeoff from an asynchronous population,  
566 then 15  $\mu$ M paclitaxel or DMSO was added to the cells remaining on the dish. For both  
567 populations, G2-phase cells were allowed to enter mitosis, and then harvested in  
568 mitosis by shakeoff 3 h later. Cells were plated on coverslips and forced to exit mitosis  
569 by treatment with 10  $\mu$ M RO-3306, then fixed for immunofluorescence 3 h later. Cells  
570 with micronuclei were analyzed for centrin/CP110 presence in both conditions.

571

### 572 **Immunoprecipitation**

573 HEK293T cells were co-transfected with GFP-delta-tubulin and myc-epsilon-tubulin, or  
574 GFP and myc-epsilon-tubulin using PEI. 48 hours after transfection, cells were



575 harvested and lysed in lysis buffer (50 mM Hepes pH7.4, 150 mM NaCl, 1 mM DTT, 1  
576 mM EGTA, 1 mM MgCl<sub>2</sub>, 0.25 mM GTP, 0.5% Triton X-100, 1 µg/ml each leupeptin,  
577 pepstatin, and chymostatin, and 1 mM phenylmethylsulfonyl fluoride). Insoluble material  
578 was pelleted, and soluble material was incubated at 4 °C with GFP-binding protein  
579 (Rothbauer et al., 2008) coupled to NHS-activated Sepharose 4 Fast Flow resin (GE  
580 Healthcare) for 2 h. Beads were pelleted at 500 g for 1 min, washed three times with  
581 lysis buffer, then eluted in sample buffer and the eluate was run on SDS-PAGE gels.  
582 Western blots were scanned on a LiCOR imager and analyzed using ImageJ.

583

584

### 585 **Acknowledgements**

586 We thank Meng-Fu Bryan Tsou for the gift of hTERT RPE-1 *TP53* <sup>-/-</sup> cells, Olga  
587 Cormier for help with evolutionary analysis, and David Breslow and Max Nachury for  
588 sharing unpublished data. This work was supported by National Research Service  
589 Award grant 5 F32 GM117678 to J.T.W., the Intramural Research Program of the  
590 National Institutes of Health, National Cancer Institute, Center for Cancer Research to  
591 J.L., and NIH grant R01GM052022 to T.S.

592

### 593 **Competing Interests**

594 We declare no competing interests at this time.

## References

- Allen, R.D. (1969). The morphogenesis of basal bodies and accessory structures of the cortex of the ciliated protozoan *Tetrahymena pyriformis*. *J Cell Biol* **40**, 716-733.
- Azimzadeh, J., Hergert, P., Delouvé, A., Euteneuer, U., Formstecher, E., Khodjakov, A., and Bornens, M. (2009). hPOC5 is a centrin-binding protein required for assembly of full-length centrioles. *The Journal of Cell Biology* **185**, 101–114.
- Balestra, F.R., Tobel, von, L., and Gönczy, P. (2015). Paternally contributed centrioles exhibit exceptional persistence in. *Cell Res.* **25**, 642–644.
- Bazzi, H., and Anderson, K.V. (2014). Acentriolar mitosis activates a p53-dependent apoptosis pathway in the mouse embryo. *Proceedings of the National Academy of Sciences* **111**, E1491–E1500.
- Cong, L., Ran, F.A., Cox, D., Lin, S., Barretto, R., Habib, N., Hsu, P.D., Wu, X., Jiang, W., Marraffini, L.A., Zhang, F. (2013). Multiplex genome engineering using CRISPR/Cas Systems. *Science* **339**, 819-823.
- Dippell, R.V. (1968). The development of basal bodies in *Paramecium*. *Proceedings of the National Academy of Sciences* **61**, 461-468.
- Doonan, J.H., Lloyd, C.W., and Duckett, J.G. (1986). Anti-tubulin antibodies locate the blepharoplast during spermatogenesis in the fern *Platyzoma microphyllum* R.Br.: a correlated immunofluorescence and electron-microscopic study. *Journal of Cell Science* **81**, 243–265.
- Dupuis-Williams, P., Fleury-Aubusson, A., de Loubresse, N.G., Geoffroy, H., Vayssié, L., Galvani, A., Espigat, A., and Rossier, J. (2002). Functional role of epsilon-tubulin in the assembly of the centriolar microtubule scaffold. *J Cell Biol* **158**, 1183–1193.
- Dutcher, S.K., and Trabuco, E.C. (1998). The UNI3 gene is required for assembly of basal bodies of *Chlamydomonas* and encodes delta-tubulin, a new member of the tubulin superfamily. *Molecular Biology of the Cell* **9**, 1293–1308.
- Dutcher, S.K., Morrissette, N.S., Preble, A.M., Rackley, C., and Stanga, J. (2002). Epsilon-tubulin is an essential component of the centriole. *Molecular Biology of the Cell* **13**, 3859–3869.
- Findeisen, P., Mühlhausen, S., Dempewolf, S., Hertzog, J., Zietlow, A., Carlomagno, T., and Kollmar, M. (2014). Six subgroups and extensive recent duplications characterize the evolution of the eukaryotic tubulin protein family. *Genome Biol Evol* **6**, 2274–2288.
- Fu, J., Lipinszki, Z., Rangone, H., Min, M., Mykura, C., Chao-Chu, J., Schneider, S., Dzhindzhev, N.S., Gottardo, M., Riparbelli, M.G., et al. (2015). Conserved molecular interactions in centriole-to-centrosome conversion. *Nature Cell Biology*.

Gadelha, C., Wickstead, B., McKean, P.G., and Gull, K. (2006). Basal body and flagellum mutants reveal a rotational constraint of the central pair microtubules in the axonemes of trypanosomes. *Journal of Cell Science* 119, 2405–2413.

Garreau de Loubresse, N., Ruiz, F., Beisson, J., and Klotz, C. (2001). Role of delta-tubulin and the C-tubule in assembly of Paramecium basal bodies. *BMC Cell Biol.* 2, 4.

Gifford, E.M., Jr, and Lin, J. (1975). Light microscope and ultrastructural studies of the male gametophyte in *Ginkgo biloba*: the spermatogenous cell. *American Journal of Botany*.

Goodenough, U.W., and StClair, H.S. (1975). BALD-2: a mutation affecting the formation of doublet and triplet sets of microtubules in *Chlamydomonas reinhardtii*. *J Cell Biol* 66, 480–491.

Gottardo, M., Callaini, G., and Riparbelli, M.G. (2015). The *Drosophila* centriole - conversion of doublets into triplets within the stem cell niche. *Journal of Cell Science* 128, 2437–2442.

Graser, S., Stierhof, Y.-D., Lavoie, S.B., Gassner, O.S., Lamla, S., Le Clech, M., and Nigg, E.A. (2007). Cep164, a novel centriole appendage protein required for primary cilium formation. *J Cell Biol* 179, 321–330.

Guarguaglini, G., Duncan, P.I., Stierhof, Y.D., Holmström, T., Duensing, S., and Nigg, E.A. (2005). The forkhead-associated domain protein Cep170 interacts with Polo-like kinase 1 and serves as a marker for mature centrioles. *Molecular Biology of the Cell* 16, 1095–1107.

Guichard, P., Hamel, V., Le Guennec, M., Banterle, N., Iacovache, I., Nemčiková, V., Flückiger, I., Goldie, K.N., Stahlberg, H., Lévy, D., et al. (2017). Cell-free reconstitution reveals centriole cartwheel assembly mechanisms. *Nat Commun* 8, 14813.

Guichard, P., Hachet, V., Majubu, N., Neves, A., Demurtas, D., Olieric, N., Flückiger, I., Yamada, A., Kihara, K., Nishida, Y., et al. (2013). Native architecture of the centriole proximal region reveals features underlying its 9-fold radial symmetry. *Curr. Biol.* 23, 1620–1628.

Held, A.A. (1975). The zoospore of *Rozella allomyces*: ultrastructure. *Canadian Journal of Botany*.

Hilbert, M., Noga, A., Frey, D., Hamel, V., Guichard, P., Kraatz, S.H.W., Pfreundschuh, M., Hosner, S., Flückiger, I., Jaussi, R., et al. (2016). SAS-6 engineering reveals interdependence between cartwheel and microtubules in determining centriole architecture. *Nature Cell Biology* 18, 393–403.

Hoage, T.R., and Kessel, R.G. (1968). An electron microscope study of the process of differentiation during spermatogenesis in the drone honey bee (*Apis mellifera* L.) with special reference to centriole replication and elimination. *J. Ultrastruct. Res.* 24, 6–32.

Khodjakov, A., and Rieder, C.L. (1999). The sudden recruitment of gamma-tubulin to the centrosome at the onset of mitosis and its dynamic exchange throughout the cell cycle, do not require microtubules. *J Cell Biol* *146*, 585-596.

Kochanski, R.S., and Borisy, G.G. (1990). Mode of centriole duplication and distribution. *J Cell Biol* *110*, 1599-1605.

Izquierdo, D., Wang, W.-J., Uryu, K., and Tsou, M.-F.B. (2014). Stabilization of cartwheel-less centrioles for duplication requires CEP295-mediated centriole-to-centrosome conversion. *Cell Rep* *8*, 957–965.

Kleylein-Sohn, J., Westendorf, J., Le Clech, M., Habedanck, R., Stierhof, Y.-D., and Nigg, E.A. (2007). Plk4-induced centriole biogenesis in human cells. *Developmental Cell* *13*, 190–202.

Kong, D., and Loncarek, J. (2015). Correlative light and electron microscopy analysis of the centrosome: A step-by-step protocol. *Methods Cell Biol.* *129*, 1–18.

Lambrus, B.G., Uetake, Y., Clutario, K.M., Daggubati, V., Snyder, M., Sluder, G., and Holland, A.J. (2015). p53 protects against genome instability following centriole duplication failure. *The Journal of Cell Biology* *210*, 63–77.

La Terra, S., English, C.N., Hergert, P., McEwen, B.F., Sluder, G., and Khodjakov, A. (2005). The de novo centriole assembly pathway in HeLa cells: cell cycle progression and centriole assembly/maturation. *The Journal of Cell Biology* *168*, 7130722.

Lee, Y.L., Sante, J., Comerci, C., Cyge, B., and Stearns, T. (2014). Cby1 promotes Ahi1 recruitment to a ring-shaped domain at the centriole-cilium interface and facilitates proper cilium formation and function. 1–46.

Li, S., Fernandez, J.-J., Marshall, W.F., and Agard, D.A. (2012). Three-dimensional structure of basal body triplet revealed by electron cryo-tomography. *Embo J.* *31*, 552–562.

Loncarek, J., Hergert, P., Magidson, V., and Khodjakov, A. (2008). Control of daughter centriole formation by the pericentriolar material. *Nature Cell Biology* *10*, 322–328.

McKean, P.G., Banes, A., Vaughan, S., Gull, K. (2003). Gamma-tubulin functions in the nucleation of a discrete subset of microtubules in the eukaryotic flagellum. *Current Biology* *13*, 598-602.

Meehl, J.B., Bayless, B.A., Giddings, T.H., Pearson, C.G., and Winey, M. (2016). *Tetrahymena* Poc1 ensures proper intertriplet microtubule linkages to maintain basal body integrity. *Molecular Biology of the Cell* *27*, 2394–2403.

Nechipurenko, I.V., Berciu, C., Sengupta, P., and Nicastro, D. (2017). Centriolar remodeling underlies basal body maturation during ciliogenesis in *Caenorhabditis elegans*. *eLife*.

Nigg, E.A., Stearns, T. (2011). The centrosome cycle: Centriole biogenesis, duplication, and inherent asymmetries. *Nature Cell Biology* 13, 1154-1160.

Paintrand, M., Moudjou, M., Delacroix, H., and Bornens, M. (1992). Centrosome organization and centriole architecture: their sensitivity to divalent cations. *J. Struct. Biol.* 108, 107–128.

Ringo, D.L. (1967). Flagellar motion and fine structure of the flagellar apparatus in *Chlamydomonas*. *J. Cell Biol.* 33, 543-571.

Ross, I., Clarissa, C., Giddings, T.H., and Winey, M. (2013).  $\epsilon$ -tubulin is essential in *Tetrahymena thermophila* for the assembly and stability of basal bodies. *Journal of Cell Science* 126, 3441–3451.

Rothbauer, U., Zolghadr, K., Muyldermans, S., Schepers, A., Cardoso, M.C., and Leonhardt, H. (2008). A versatile nanotrap for biochemical and functional studies with fluorescent fusion proteins. *Molecular & Cellular Proteomics* 7, 282–289.

Sanjana, N.E., Shalem, O., and Zhang, F. (2014). Improved vectors and genome-wide libraries for CRISPR screening. *Nature Methods* 11, 783–784.

Serwas, D., Su, T.Y., Roessler, M., Wang, S., and Dammermann, A. (2017). Centrioles initiate cilia assembly but are dispensable for maturation and maintenance in *C. elegans*. *The Journal of Cell Biology*.

Shalem, O., Sanjana, N.E., Hartenian, E., Shi, X., Scott, D.A., Mikkelsen, T.S., Heckl, D., Ebert, B.L., Root, D.E., Doench, J.G., et al. (2014). Genome-scale CRISPR-Cas9 knockout screening in human cells. *Science* 343, 84–87.

Sonnen, K.F., Schermelleh, L., Leonhardt, H., and Nigg, E.A. (2012). 3D-structured illumination microscopy provides novel insight into architecture of human centrosomes. *Biol Open* 1, 965–976.

Tsou, M.-F.B., and Stearns, T. (2006). Mechanism limiting centrosome duplication to once per cell cycle. *Nature* 442, 947–951.

Tsou, M.-F.B., Wang, W.-J., George, K.A., Uryu, K., Stearns, T., and Jallepalli, P.V. (2009). Polo kinase and separase regulate the mitotic licensing of centriole duplication in human cells. *Developmental Cell* 17, 344–354.

Turk, E., Wills, A.A., Kwon, T., Sedzinski, J., Wallingford, J.B., and Stearns, T. (2015). Zeta-Tubulin Is a Member of a Conserved Tubulin Module and Is a Component of the Centriolar Basal Foot in Multiciliated Cells. *Curr. Biol.* 25, 2177–2183.

Vorobjev, I.A., and Chentsov, Y.S. (1980). The ultrastructure of centriole in mammalian tissue culture cells. *Cell Biol. Int. Rep.* 4, 1037-1044.

Vorobjev, I.A., and Chentsov, Y.S. (1982). Centrioles in the cell cycle. I. Epithelial cells.

The Journal of Cell Biology 98, 938-949.

Wang, W.-J., Acehan, D., Kao, C.-H., Jane, W.-N., Uryu, K., and Tsou, M.-F.B. (2015). De novo centriole formation in human cells is error-prone and does not require SAS-6 self-assembly. *eLife* 4.

Wong, Y.L., Anzola, J.V., Davis, R.L., Yoon, M., Motamedi, A., Kroll, A., Seo, C.P., Hsia, J.E., Kim, S.K., Mitchell, J.W., et al. (2015). Cell biology. Reversible centriole depletion with an inhibitor of Polo-like kinase 4. *Science* 348, 1155–1160.

# Figure 1

**A**

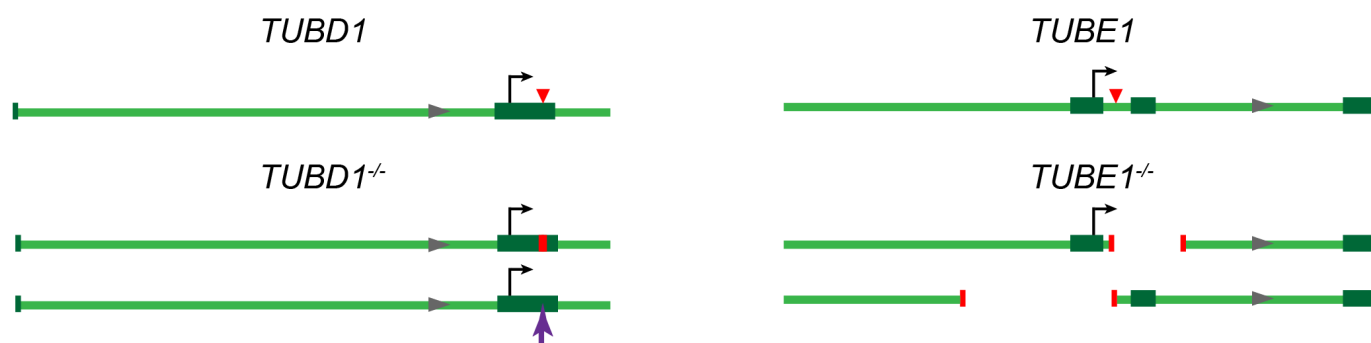

**B**

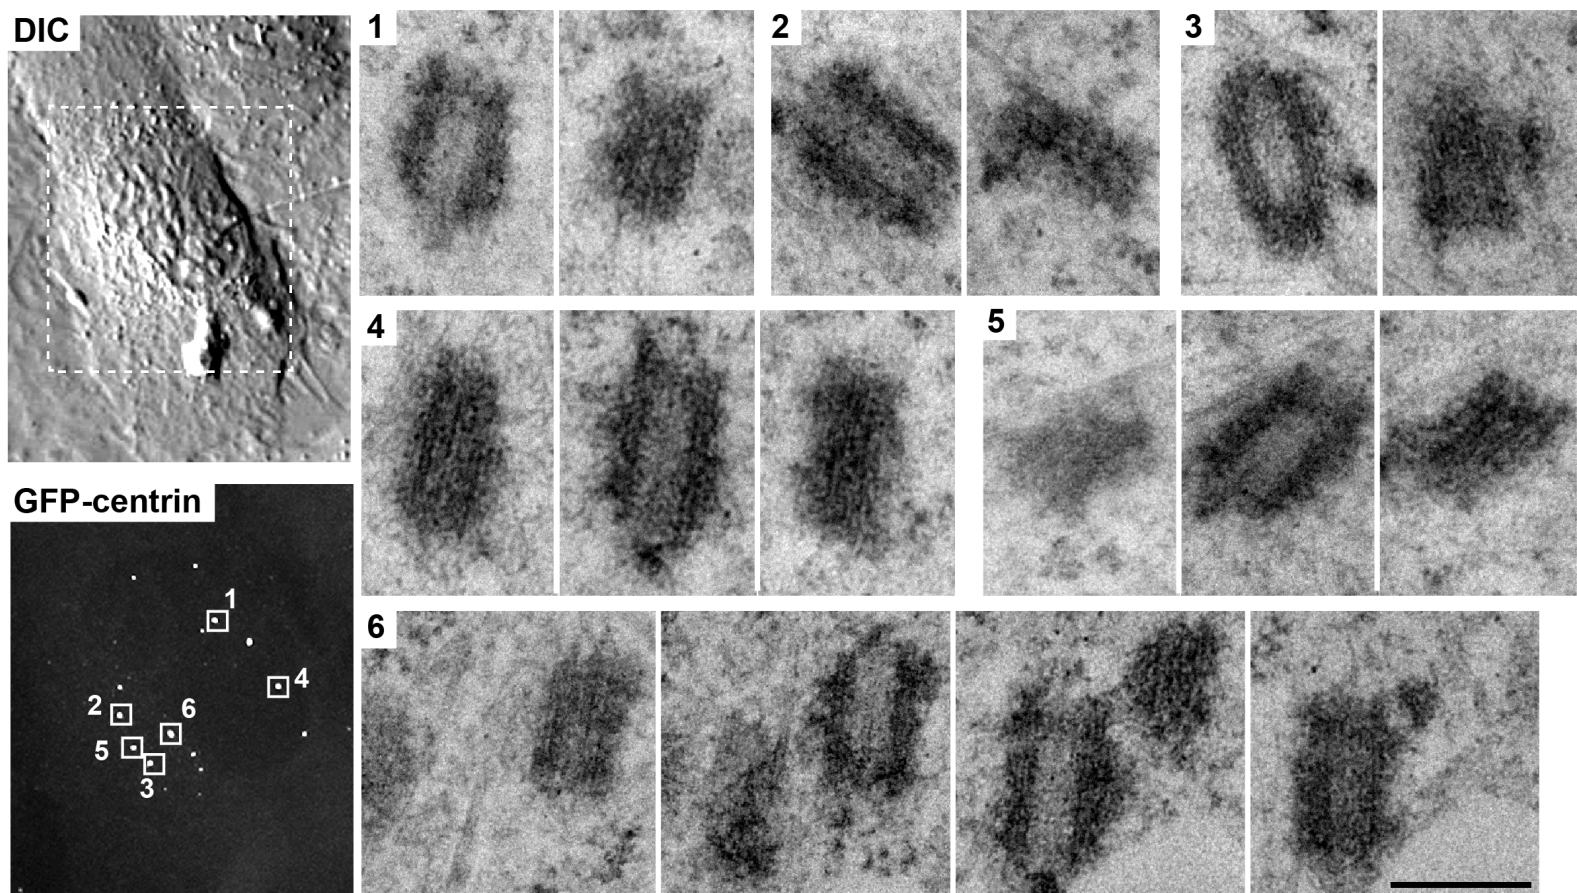

**C**

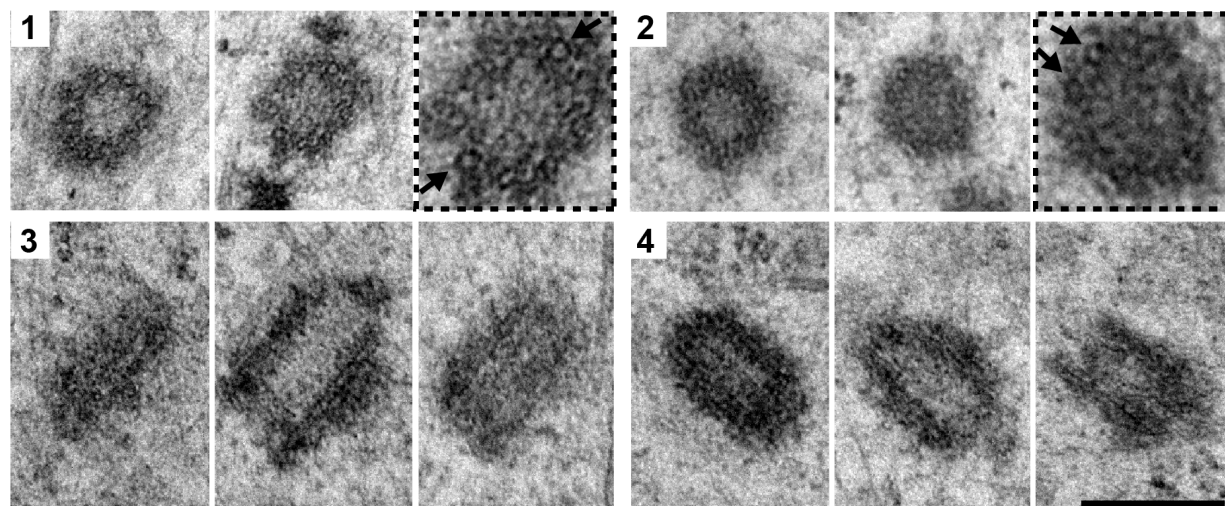

# Figure 1 - supplement 1

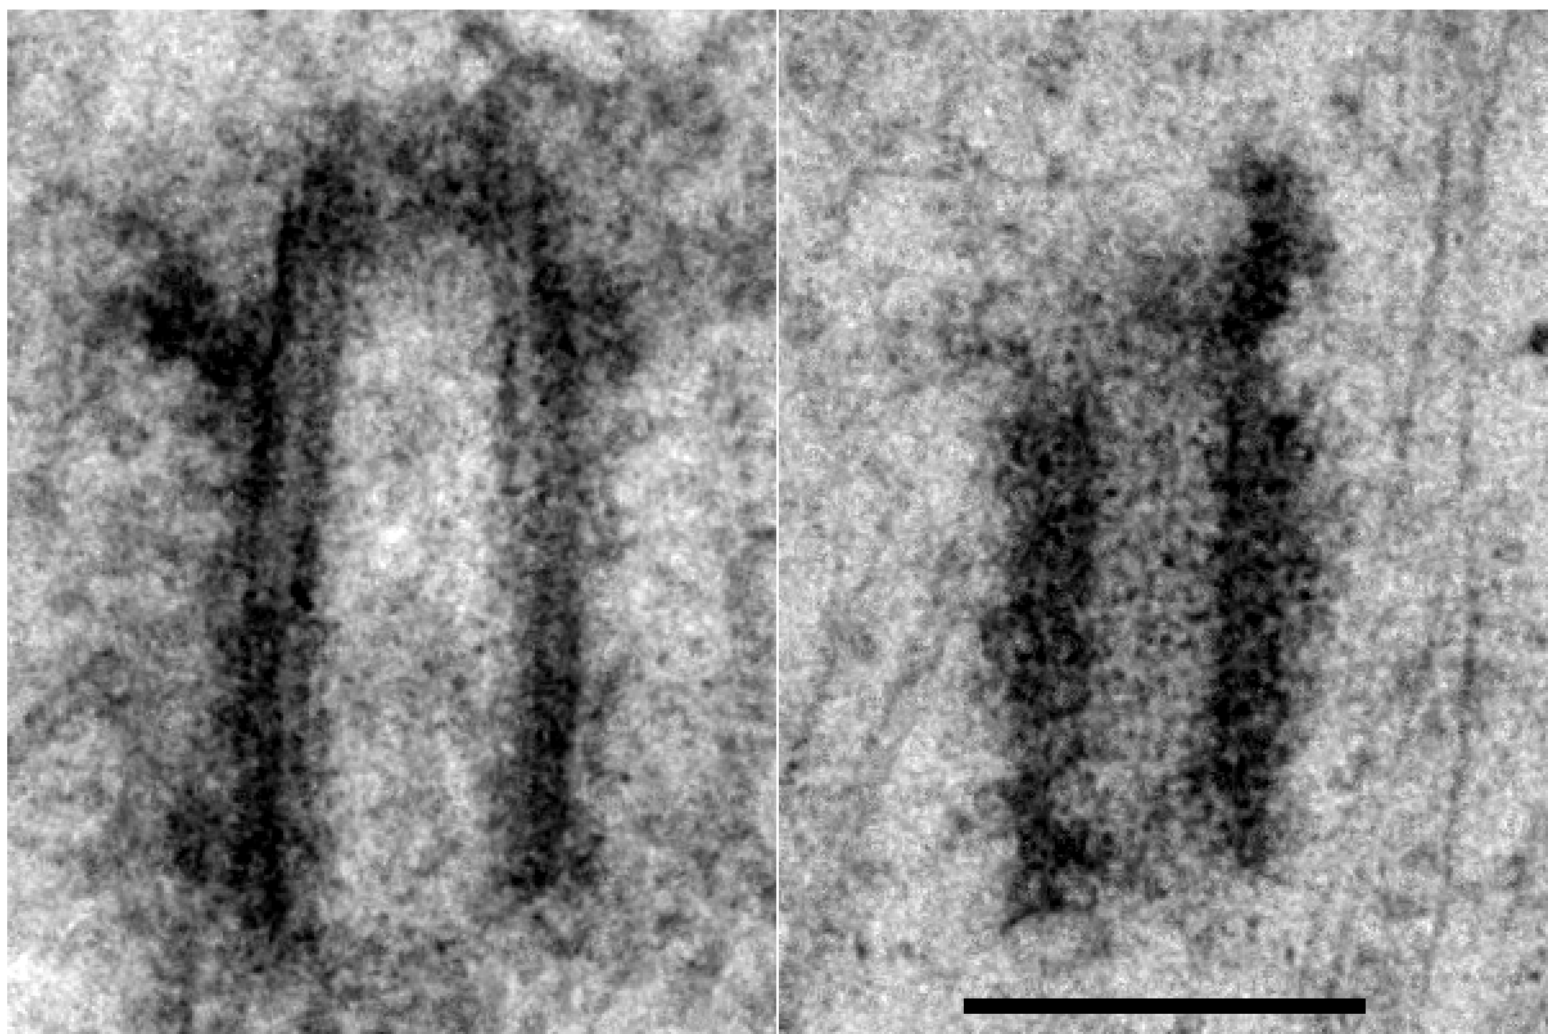



## Figure 2

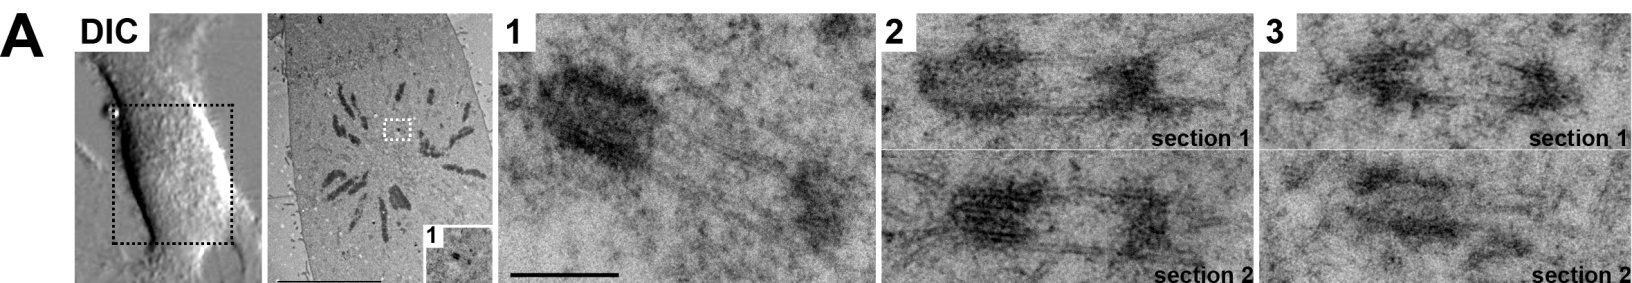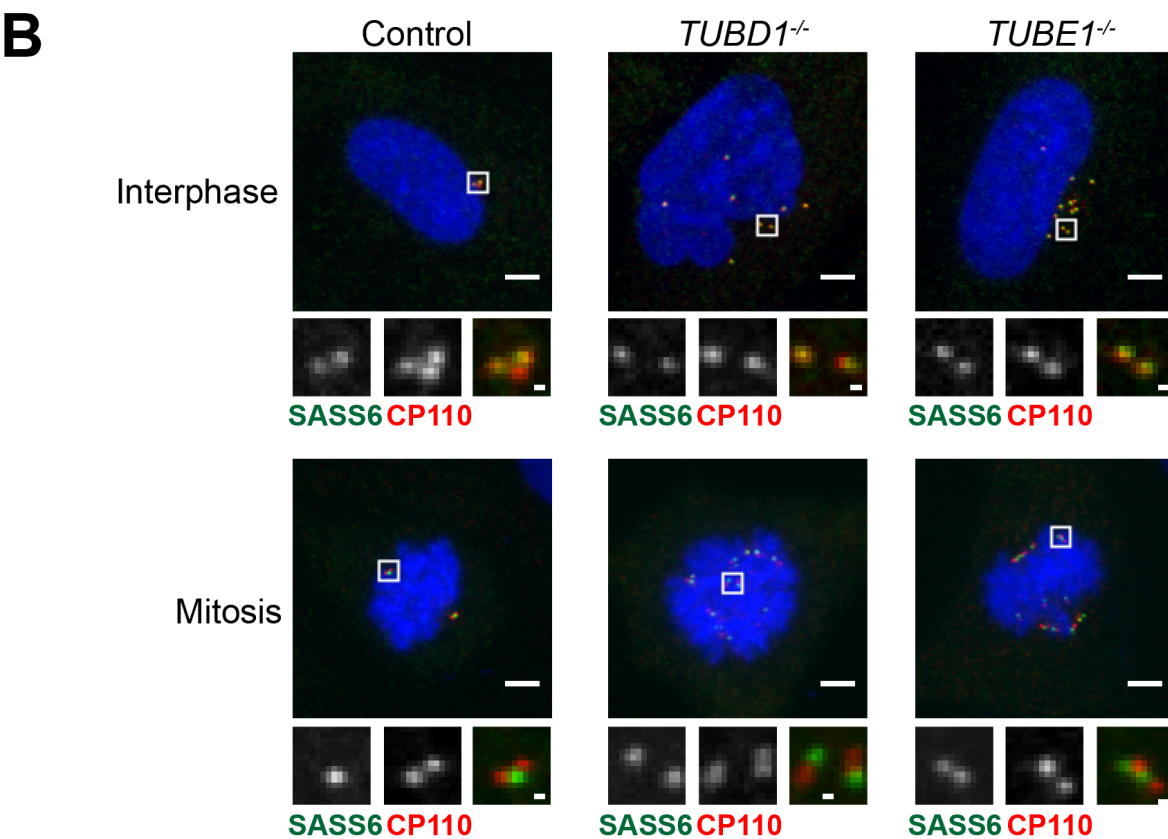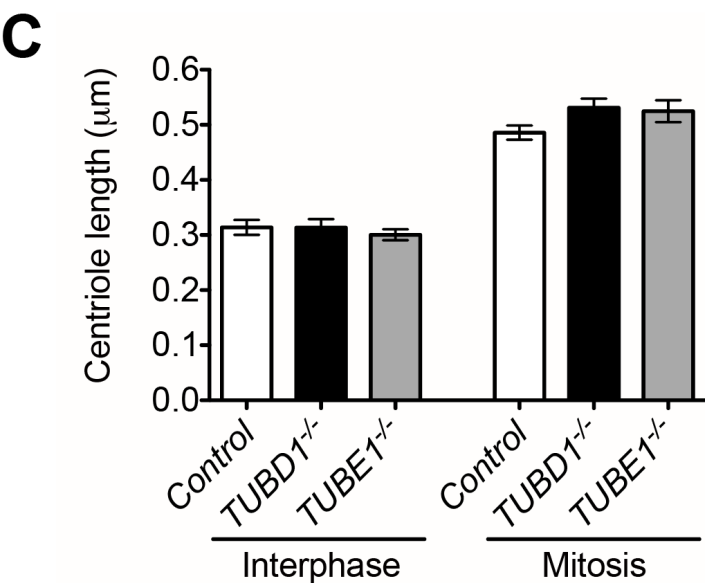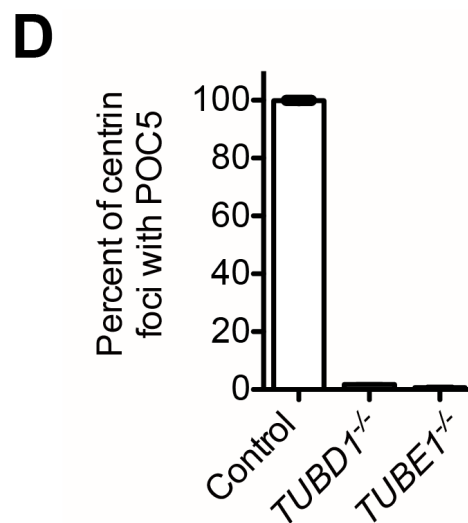

## Figure 3

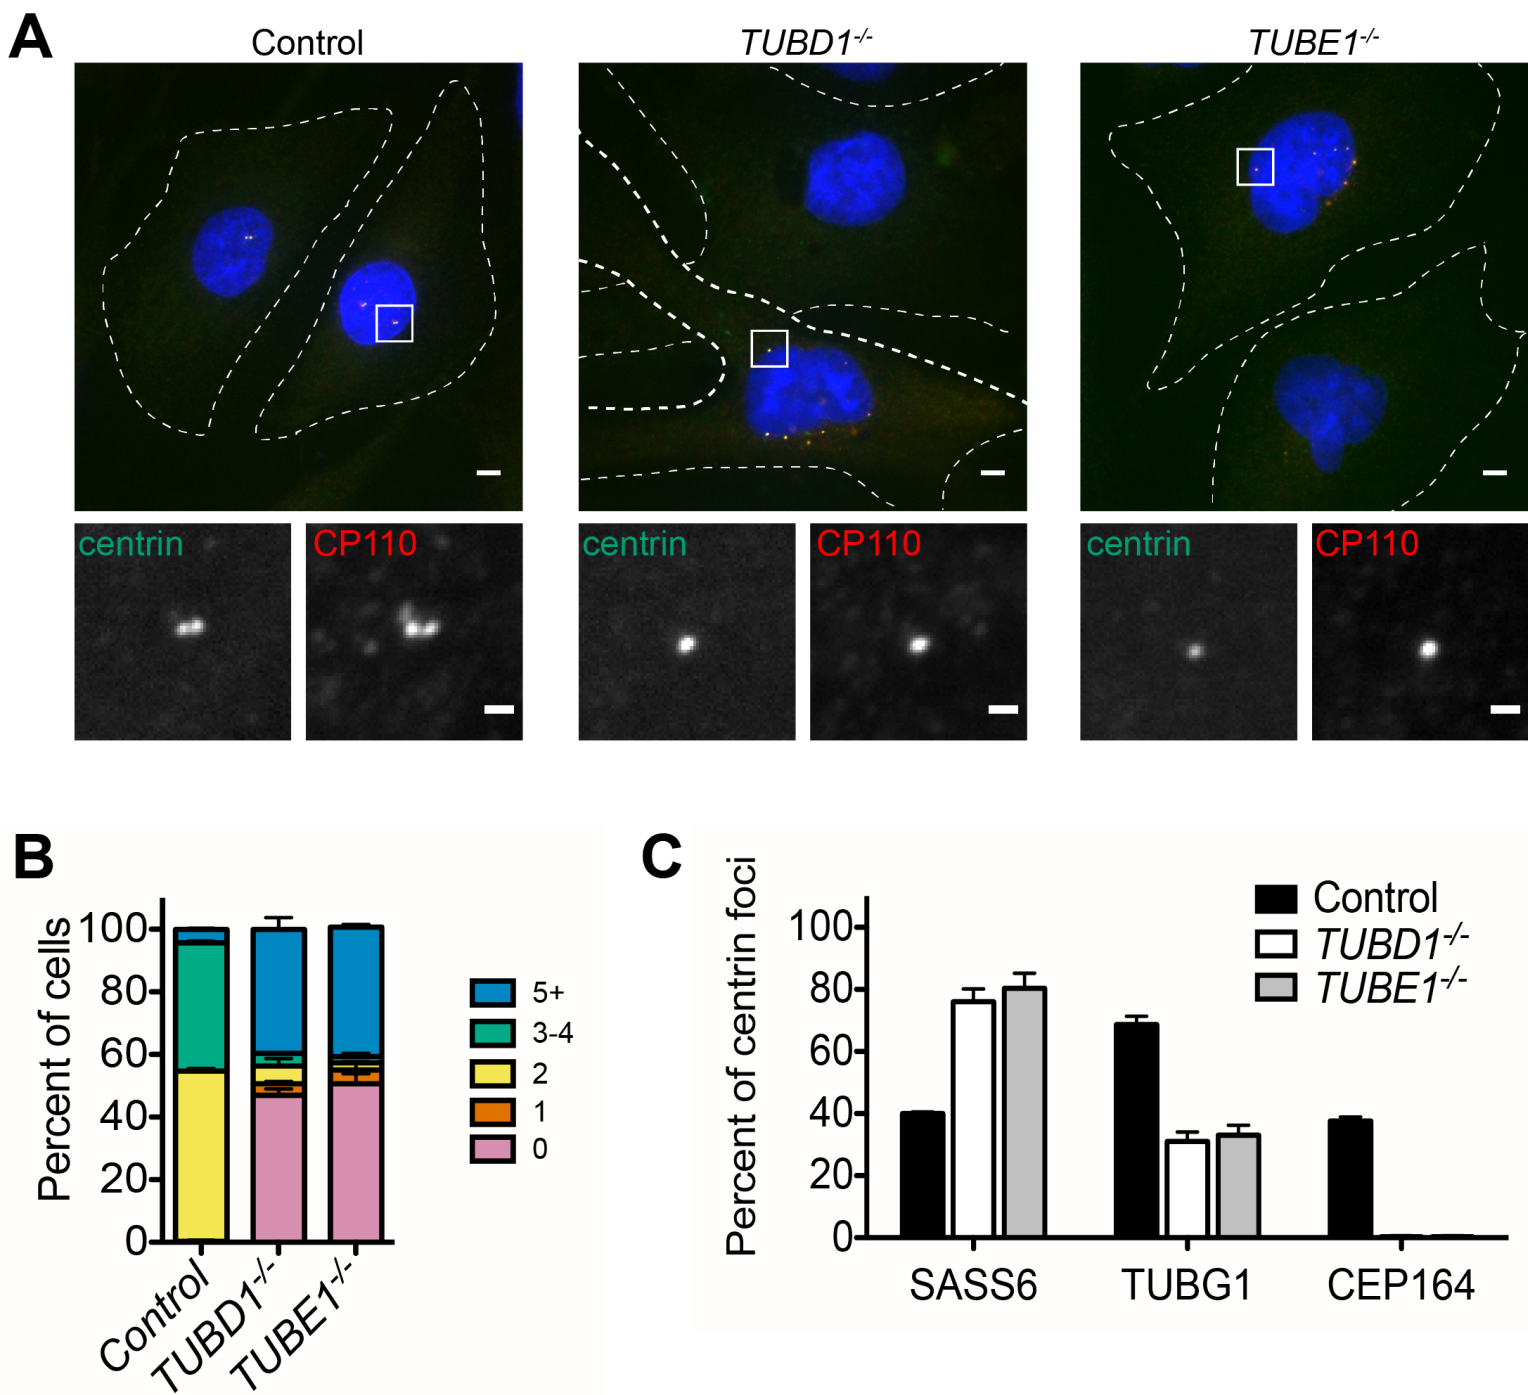

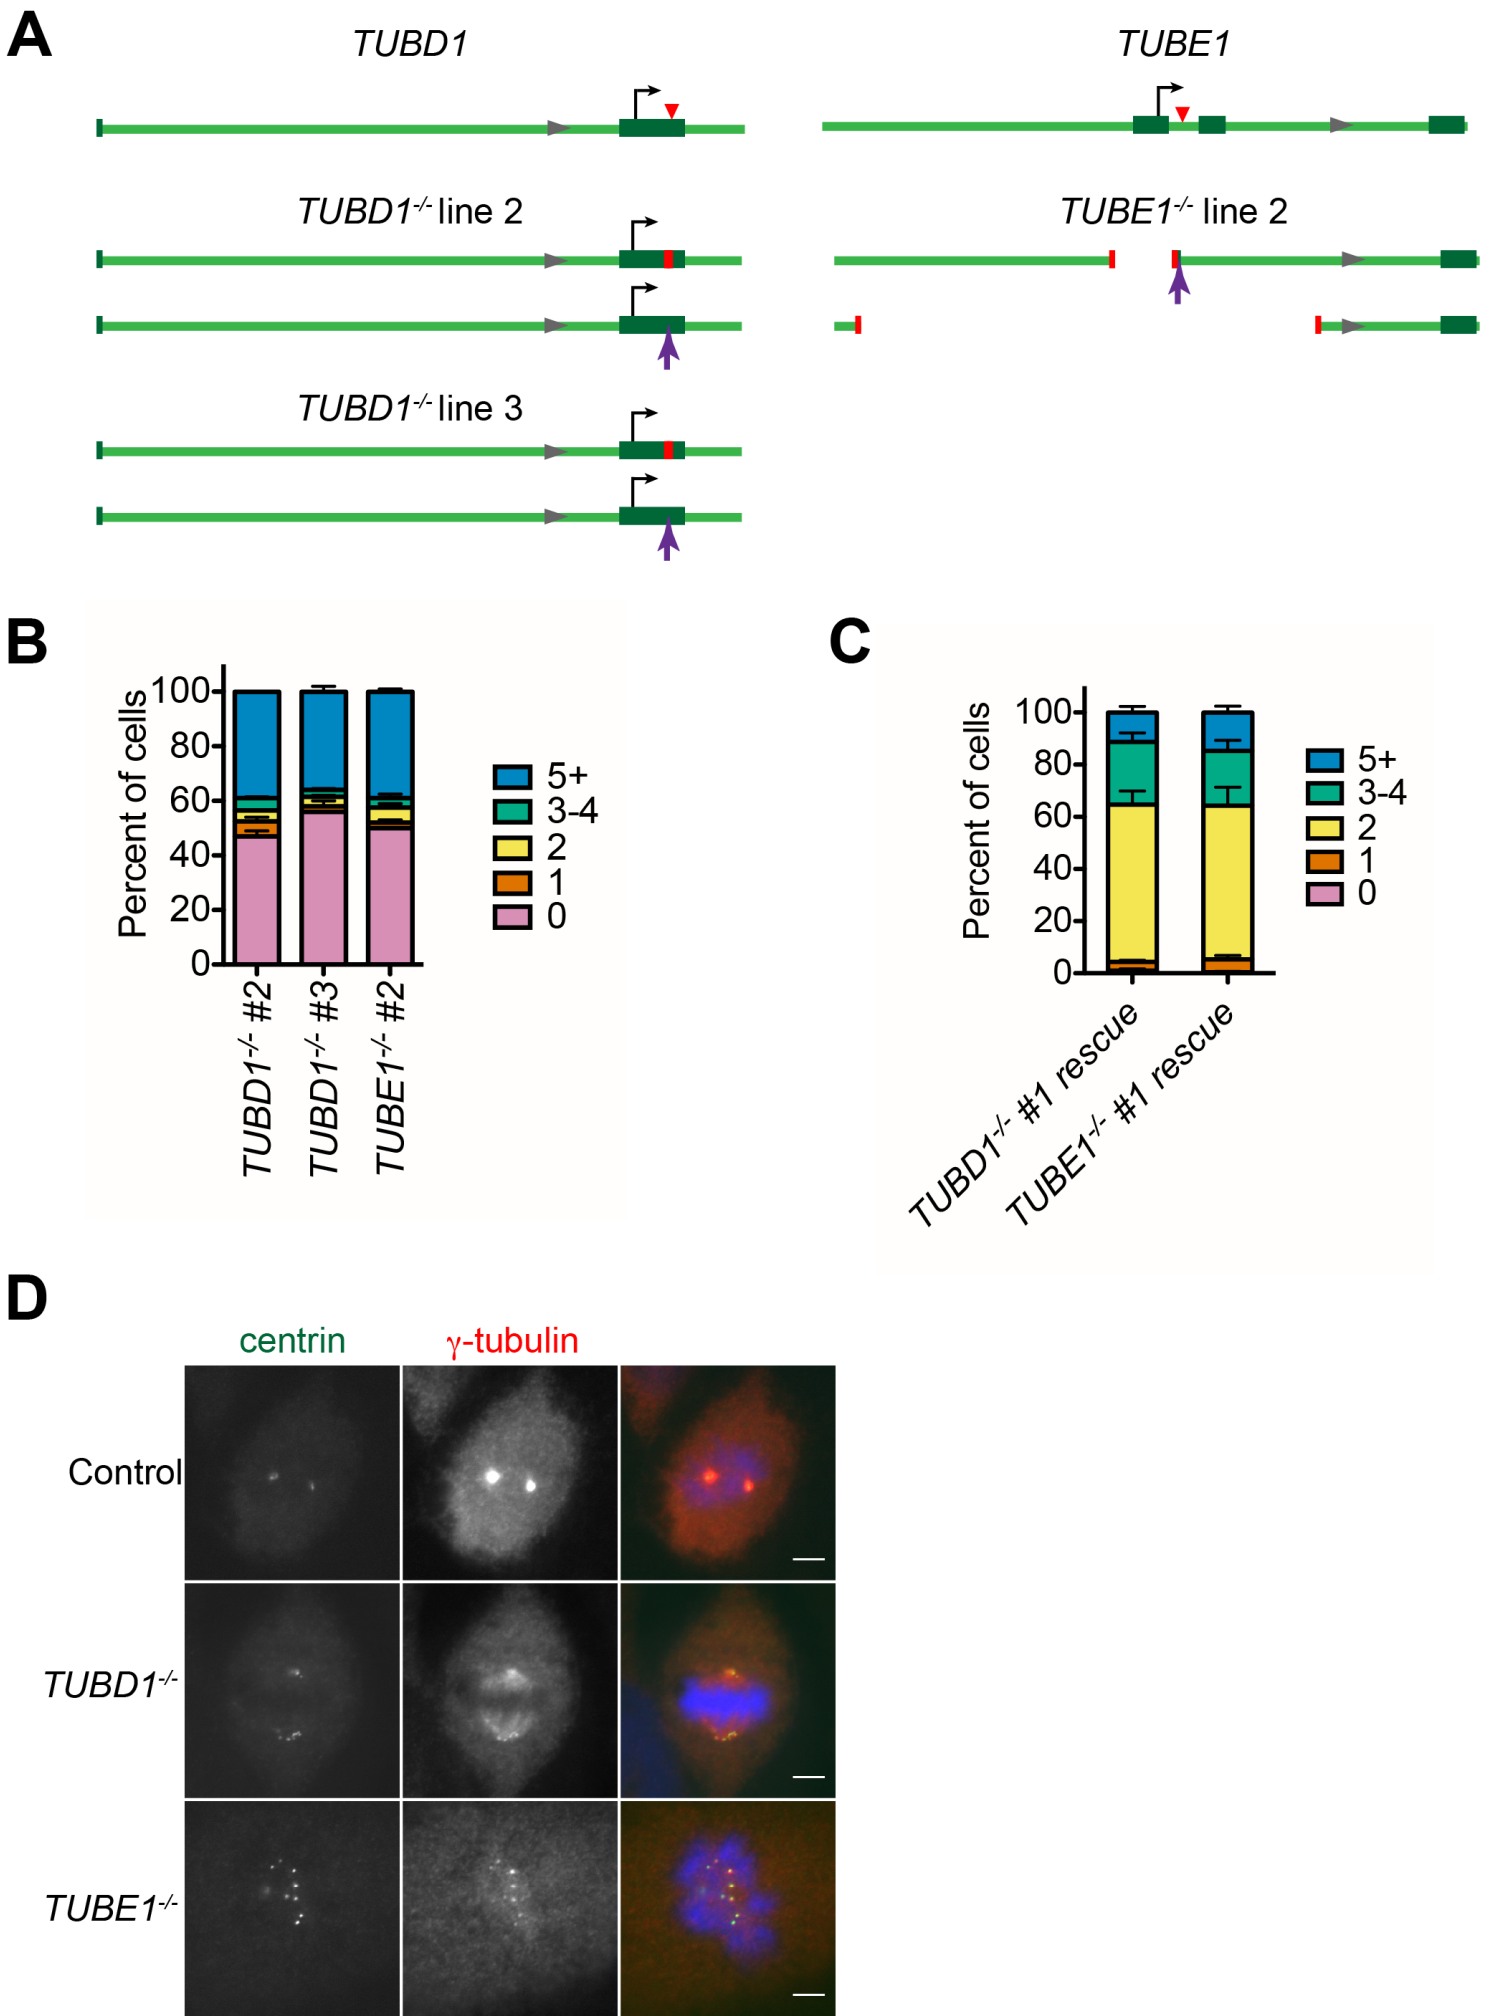

# Figure 4

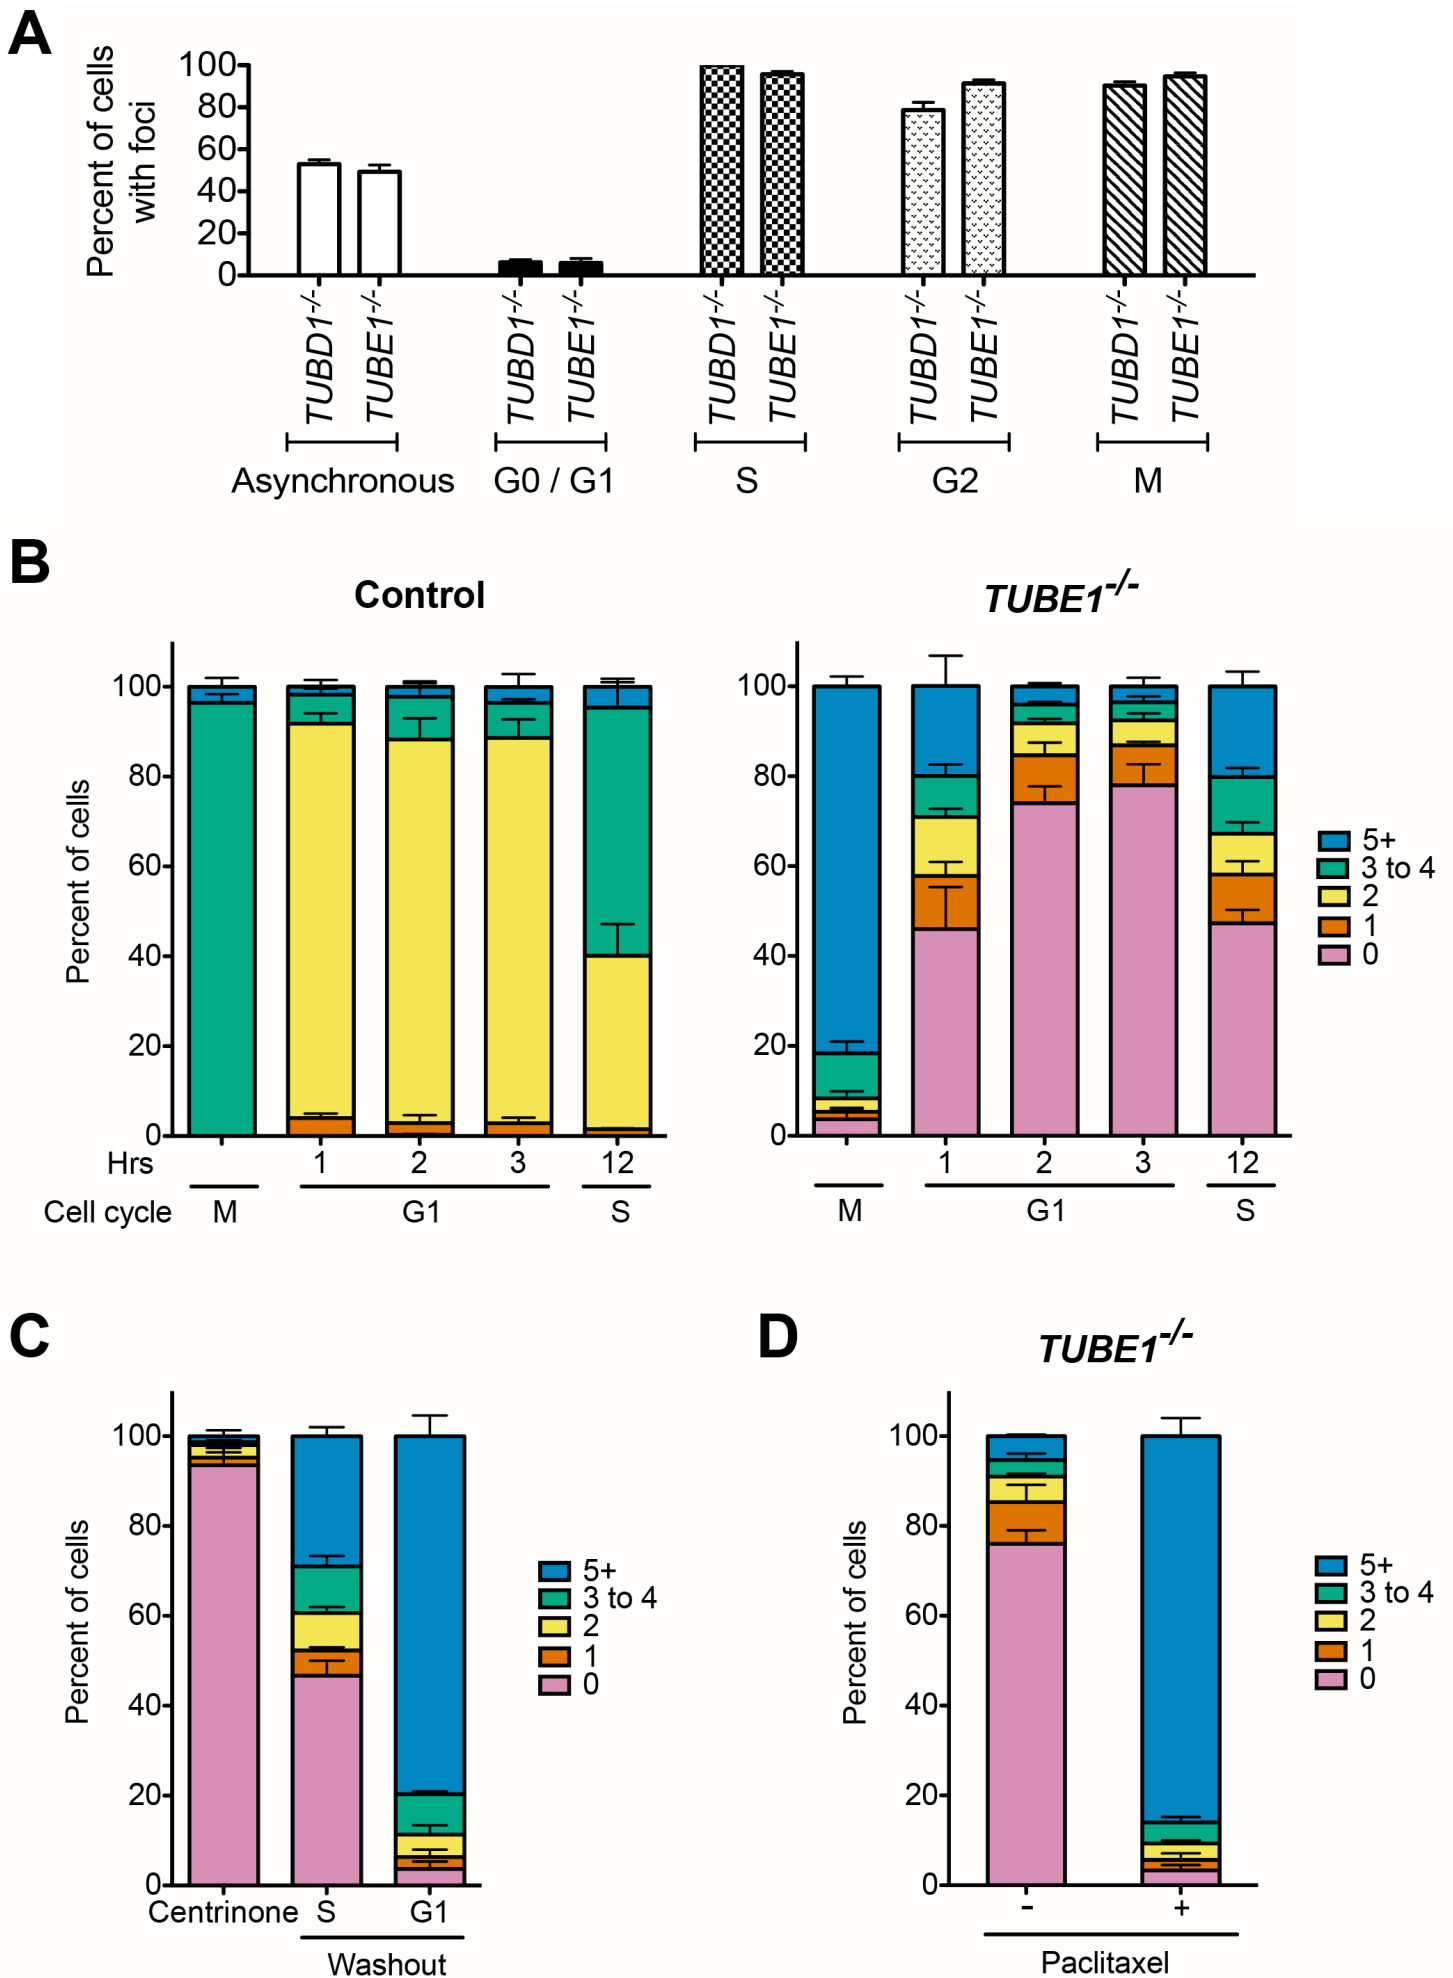

# Figure 4 Supplement 1

**A**

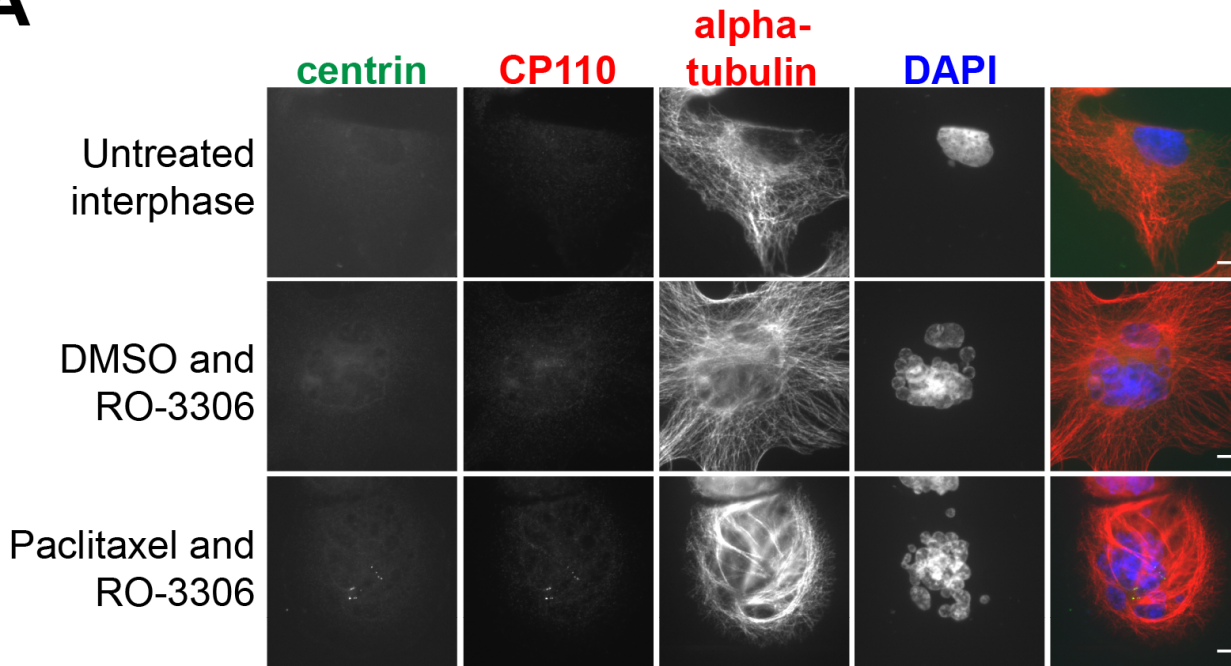

**B**

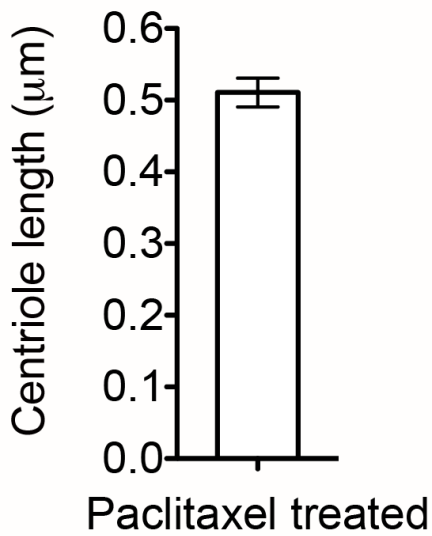

**C**

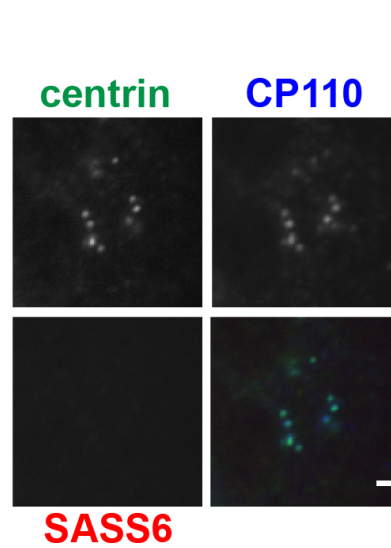

Interphase cells lacking SASS6 in any centriole

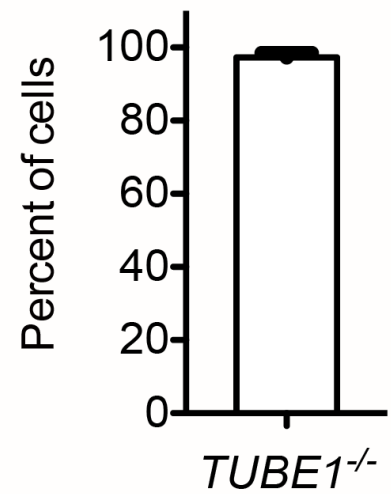

**D**

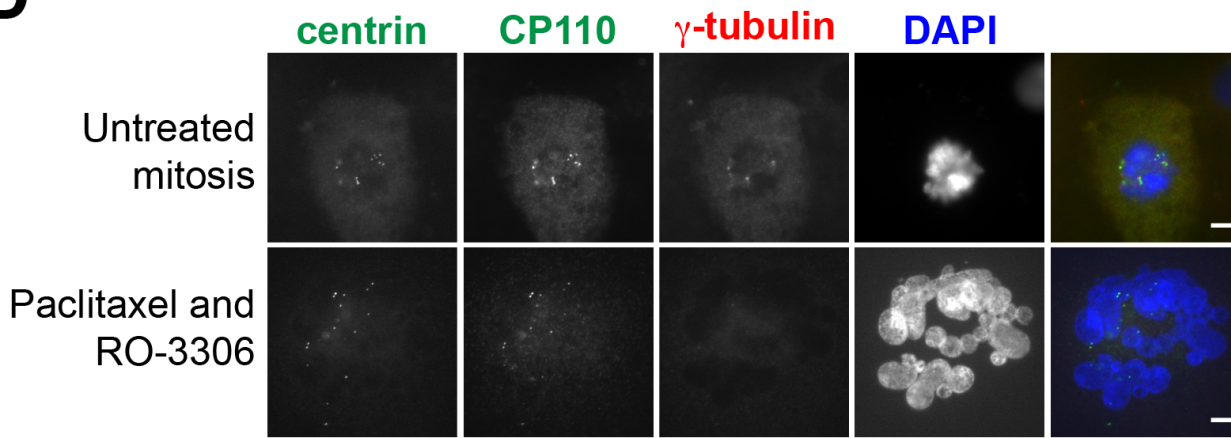

# Figure 6

## A

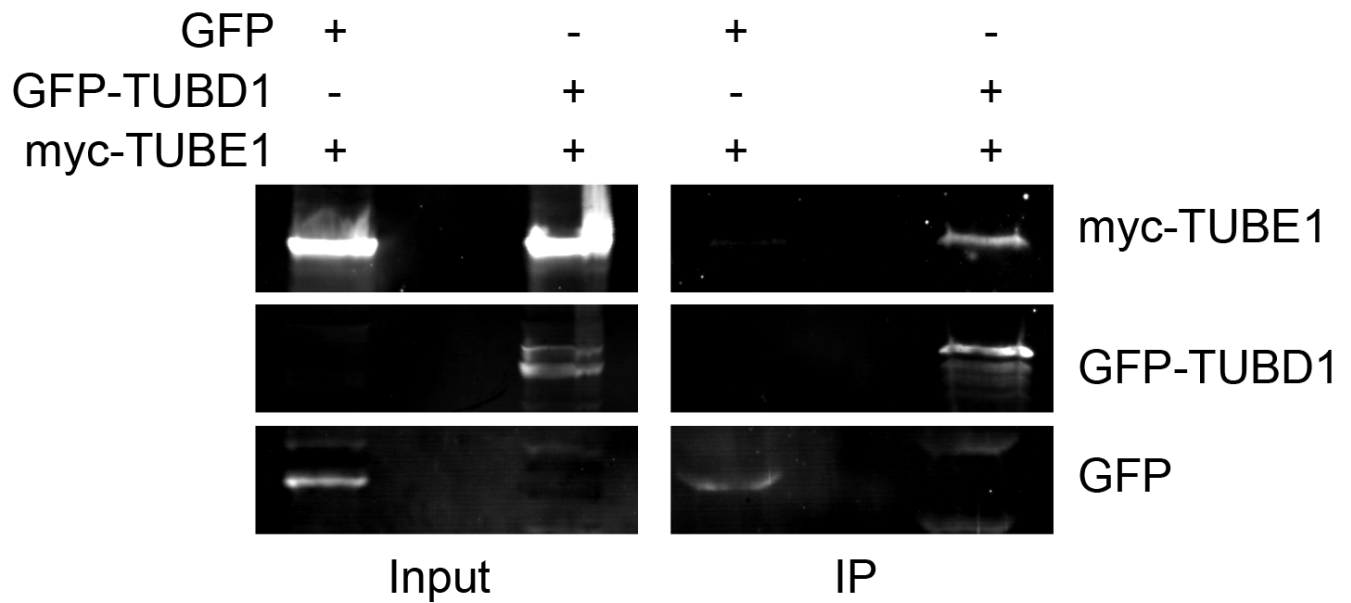

## B

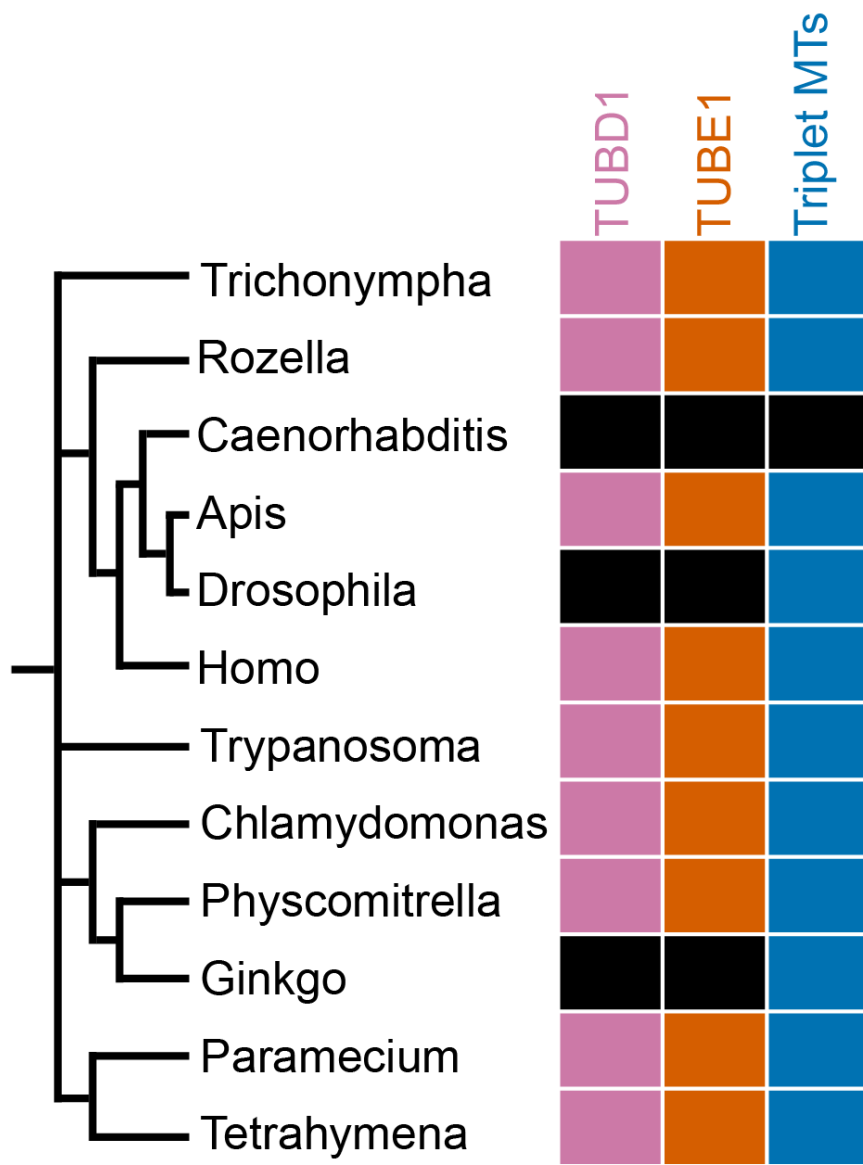

**Figure 5 – figure supplement 1: Expanded evolutionary analysis**

| <b>Genus</b>   | <b>TUBD1 accession</b> | <b>TUBE1 accession</b> | <b>Centriolar microtubule reference</b>               |
|----------------|------------------------|------------------------|-------------------------------------------------------|
| Trichonympha   | AB819960               | AB819961               | (Guichard et al., 2013)                               |
| Rozella        | EPZ31138               | EPZ34661               | (Held, 1975)                                          |
| Caenorhabditis | None                   | None                   | (Nechipurenko et al., 2017; Serwas et al., 2017)      |
| Apis           | XP_394700              | XP_003250659           | (Hoage and Kessel, 1968)                              |
| Drosophila     | None                   | None                   | (Gottardo et al., 2015)                               |
| Homo           | NP_057346              | NP_057345              | (Vorobjev and Chentsov, 1980; Paintrand et al., 1992) |
| Trypanosoma    | XP_822372              | XP_829157              | (McKean et al., 2003)                                 |
| Chlamydomonas  | XP_001703303           | AAB71840               | (Ringo, 1967; Li et al., 2012)                        |
| Physcomitrella | XP_001784101           | XP_001753613           | (Doonan et al., 1986)                                 |
| Ginkgo         | None                   | None                   | (Gifford and Lin, 1975)                               |
| Paramecium     | XP_001437029           | XP_001429943           | (Dippell, 1968)                                       |
| Tetrahymena    | XP_001010767           | XP_001017563           | (Allen, 1969)                                         |
